# Supplementary material
Source: publisher figshare collection journal article supplement (https://gsapubs.figshare.com/ndownloader/files/38872314)
Supplement: Supplementary file 1 [file 38872314]

## Sheet: Sheet1
TABLE S1: FLUID INCLUSION DATA AND ESTIMATED OVERBURDEN
Location	Latitude	Longitude	Cross Section Location ID	Formation*	Vein Set†††	Mineral	Pressure Method†	Minimum ThH§ in Assemblage (oC)	N# ThH	Type**	Percent CO2 (%)	Range ThA†† in Highest Temperature Assemblage (oC)	N# ThA	Type**	Estimated Stratigraphic distance to top of Misissippian (km)	Temperature used for pressure determination (oC)	Trapping Pressure 25oC km-1 (Mpa)	Trapping Pressure 20oC km-1 Mpa)	Trapping Depth 25oC km-1 (Mpa)	Trapping Depth 20oC km-1 (Mpa)	Syntectonic Burial 25oC km-1 (km)	Syntectonic Burial 20oC km-1 (km)	Syntectonic Burial Average 22.5oC km-1 (km)	Data Source			Evans, M.A., 2023, Syntectonic sediment loading and fold-thrust belt structural architecture: An example from the central Appalachians (USA): Geosphere, v. 19, https://doi.org/10.1130/GES02573.1
Cross Section 1
HKYRN 111	41.1164	-75.7239	1	Mp	WNW	Quartz	GG	N.A.§§	N.A.	N.A.	N.A.	218.5	9	U	1.2	218.5	206	258	7.9	9.9	6.7	8.7	7.7	This study
WEATH 912	40.8788	-75.7869	4	Mp	ENE	Quartz	GG	N.A.	N.A.	N.A.	N.A.	140	4	U	1.2	140	125	156	4.8	6	3.6	4.8	4.2	This study
FREEL 713	41.027	-75.9644	2	Mmc	SZV	Quartz	GG	N.A.	N.A.	N.A.	N.A.	173	6	U	0.5	173	159	199	6.1	7.7	5.6	7.2	6.4	This study
WHHVN 712	41.0033	-75.847	3	Mmc	WNW	Quartz	GG	N.A.	N.A.	N.A.	N.A.	189.9 - 190.0	3	U	0.1	190	177	221	6.8	8.5	6.7	8.4	7.6	This study
BHEAD 511	40.954	-75.4536	7	Dck	ENE	Quartz	GG	N.A.	N.A.	N.A.	N.A.	140.2	4	U	2.55	140.2	125.008	156.26	4.808	6.01	2.258	3.46	2.859	This study
KUNKL 211	40.8625	-75.4417	14	Dck	NS	Quartz	GG	N.A.	N.A.	N.A.	N.A.	144.9	6	U	3.22	144.9	130	162.37	4.996	6.245	2.5	3.7	3.1	This study
KUNKL 212	40.8625	-75.4417	14	Dck	BPV	Quartz	GG	N.A.	N.A.	N.A.	N.A.	168.5	6	U	3.22	168.5	154.44	193.05	5.94	7.425	3.4	4.9	4.15	This study
LEHIG 111	40.8591	-75.7179	5	Dck	NNW	Quartz	GG	N.A.	N.A.	N.A.	N.A.	148.6	3	U	3.22	148.6	133.744	167.18	5.144	6.43	1.9	3.2	2.6	This study
NRING 111	40.7407	-75.9706	8	Dck	ENE	Quartz	GG	N.A.	N.A.	N.A.	N.A.	202	2	U	2.29	202	189	237	7.3	9.1	5	6.8	5.9	This study
TAMAQ 832	40.7729	-75.9557	6	Dck	NW	Quartz	GG	N.A.	N.A.	N.A.	N.A.	123	3	U	0.56	123	107	134	4.1	5.1	3.5	4.6	4.1	This study
LEHIG 311	40.8377	-75.6632	13	Db and Dtr	NE	Quartz	GG	N.A.	N.A.	N.A.	N.A.	186	4	U	3.22	186	172.64	215.8	6.64	8.3	3.42	5.08	4.25	This study
LEHIG 312	40.8377	-75.6632	13	Db and Dtr	NNE	Quartz	GG	N.A.	N.A.	N.A.	N.A.	210.5	8	U	3.22	210.5	198	248	7.6	9.5	4.4	6.3	5.4	This study
NESQG 711	40.7646	-75.8668	12	Db and Dtr	NE	Quartz	GG	N.A.	N.A.	N.A.	N.A.	228	3	P	3.62	228	216.32	270.4	8.32	10.4	4.7	6.78	5.74	This study
PALMT 611	40.8227	-75.6033	376	Db and Dtr	ENE	Quartz	GG	N.A.	N.A.	N.A.	N.A.	121	4	U	3.31	121	105	131	4	5	1.2	2.2	1.7	This study
POHOP 411	40.9165	-75.5083	9	Db and Dtr	BPV	Quartz	GG	N.A.	N.A.	N.A.	N.A.	177	10	U	3.31	177	163	204	6.3	7.9	3	4.5	3.8	This study
POHOP 412	40.9165	-75.5083	9	Db and Dtr	ENE	Quartz	GG	N.A.	N.A.	N.A.	N.A.	175.4	3	U	3.31	175	161.2	201.5	6.2	7.75	2.89	4.44	3.665	This study
NESQG 721	40.7829	-75.8641	11	Dm and Dmt	NNW	Quartz	GG	N.A.	N.A.	N.A.	N.A.	205	5	P	3.62	205	192	241	7.4	9.3	3.8	5.6	4.7	This study
NESQG 812	40.7825	-75.798	10	Dm and Dmt	NE	Quartz	GG	N.A.	N.A.	N.A.	N.A.	198	7	U	3.62	198	185	231	7.1	8.9	3.4	5.2	4.3	This study
SAYLR 711	40.8822	-75.3556	15	Dm and Dmt	BPV	Quartz	MI	-154.7	7	U	4	N.A.	N.A.	N.A.	4.06	-154.7	N.D.##	505	N.D.	19.4	N.D.	14.9	N.D.	This study
SAYLR 712	40.8822	-75.3556	15	Dm and Dmt	NE	Quartz	MI	-151	7	U	5	N.A.	N.A.	N.A.	4.06	-151	N.D.	480	N.D.	18.5	N.D.	13.9	N.D.	This study
SAYLR 713	40.8822	-75.3556	15	Dm and Dmt	FV	Quartz	MI	-152.1	3	U	2	N.A.	N.A.	N.A.	4.06	-152.1	N.D.	490	N.D.	18.8	N.D.	14.3	N.D.	This study
KUNKL 311	40.8402	-75.41	16	Sb	FV	Quartz	GG	N.A.	N.A.	N.A.	N.A.	135.0 - 135.4	12	PS	4.72	135.4	120.016	150.02	4.616	5.77	-0.104	1.05	0.473	This study
PALMT 411	40.814	-75.5245	17	Sb	BPV	Quartz	GG	N.A.	N.A.	N.A.	N.A.	109.0 - 109.5	4	PS	5.06	109.5	93.08	116.35	3.58	4.475	-1.48	-0.585	-1.0325	This study
PALMT 412	40.814	-75.5245	17	Sb	NE	Quartz	GG	N.A.	N.A.	N.A.	N.A.	127.1	5	U	5.06	127.1	111	139.23	4.284	5.355	-0.776	0.295	-0.2405	This study
PALMT 414	40.814	-75.5245	17	Sb	FV	Quartz	GG	N.A.	N.A.	N.A.	N.A.	130	3	U	5.06	130	114.4	143	4.4	5.5	-0.66	0.44	-0.11	This study
Cross Section 2
POTTS 211	40.7272	-76.1851	22	Pp and Pl	ENE	Quartz	MI	-130.2	15	U	5	N.A.	N.A.	N.A.	-0.5	-130.3	N.D.	330	N.D.	12.7	N.D.	13.1	N.D.	This study
POTTS 212	40.7272	-76.1851	22	Pp and Pl	NE	Quartz	GG	N.A.	N.A.	N.A.	N.A.	205 - 230	5	P	-0.5	230	192	273	8.4	10.5	8.9	11	10	This study
POTTS 213	40.7272	-76.1851	22	Pp and Pl	NNW	Quartz	MI	-113.9	8	U	13	N.A.	N.A.	N.A.	-0.5	-113.9	212	278	8.2	10.7	8.7	11.2	9.9	This study
POTTS 21F	40.7272	-76.1851	22	Pp and Pl	N.D.	Quartz	GG	N.A.	N.A.	N.A.	N.A.	230	8	U	-0.5	230	195	273	7.5	10.5	8.9	11	9.95	This study
POTTS 511	40.681	-76.1921	23	Pp and Pl	WNW	Quartz	MI	-127	18	U	10	N.A.	N.A.	N.A.	-0.5	-127	N.D.	318	N.D.	12.2	N.D.	12.7	N.D.	This study
POTTS 512	40.681	-76.1921	23	Pp and Pl	NNW	Quartz	GG	N.A.	N.A.	N.A.	N.A.	245	3	U	-0.5	245	234	293	9	11.3	9.5	11.8	10.6	This study
POTTS 513	40.681	-76.1921	23	Pp and Pl	NE	Quartz	MI	-113	7	U	7	N.A.	N.A.	N.A.	-0.5	-113	192	244	7.4	9.4	7.9	9.9	8.9	This study
SHEND 61F	40.7923	-76.2267	21	Pp and Pl	ENE	Quartz	GG	N.A.	N.A.	N.A.	N.A.	245	5	U	-0.5	245	234	293	9	11.3	9.5	11.8	10.6	This study
POTTS 521	40.6764	-76.1892	24	Mmc	NNW	Quartz	GG	N.A.	N.A.	N.A.	N.A.	155.5	2	U	0.1	155.5	141	176	5.4	7.25	5.3	6.75	6.025	This study
BRICK 813	41.0147	-76.1831	377	Dck	ENE	Quartz	GG	N.A.	N.A.	N.A.	N.A.	171	3	P	1.3	171	157.04	196.3	6.04	7.55	4.74	6.25	5.495	This study
BRICK 111	41.0878	-76.2279	18	Db and Dtr	NNE	Quartz	GG	N.A.	N.A.	N.A.	N.A.	208.6	4	P	3.01	208.6	196.144	245.18	7.544	9.43	4.534	6.42	5.477	This study
BRICK 711	41.0374	-76.2188	20	Db and Dtr	ENE	Quartz	GG	N.A.	N.A.	N.A.	N.A.	203.1	6	P	3.13	203.1	190.424	238.03	7.324	9.155	4.194	6.025	5.1095	This study
BRICK 712	41.0374	-76.2188	20	Db and Dtr	BPV	Quartz	GG	N.A.	N.A.	N.A.	N.A.	200.5 - 201.5	6	P	3.13	201.5	188.76	235.95	7.26	9.075	4.13	5.945	5.0375	This study
ORWIG 711	40.6611	-76.1129	25	Db and Dtr	BPV	Quartz	MI	-152.5	5	P	0	N.A.	N.A.	N.A.	3.9	-152.5	N.D.	519	N.D.	20	N.D.	16.1	N.D.	This study
ORWIG 713	40.6611	-76.1129	25	Db and Dtr	ENE	Quartz	MI	-140.9	6	U	0	N.A.	N.A.	N.A.	3.9	-140.9	N.D.	352	N.D.	13.5	N.D.	9.6	N.D.	This study
MIFFL 511	41.0557	-76.2926	19	Sb	ENE	Quartz	GG	N.A.	N.A.	N.A.	N.A.	126.5 - 129.0	8	P	4.55	129	113.36	141.7	4.36	5.45	-0.19	0.9	0.355	This study
NTRIP 611F	40.6909	-75.8461	372	St	N.D.	Quartz	GG	N.A.	N.A.	N.A.	N.A.	203.5	4	U	6.52	203.5	191	239	7.3	9.2	0.8	2.7	1.3	This study
Cross Section 3
ASHLD 411	40.797	-76.2755	40	Pp and Pl	EW	Quartz	MI	-111.8	8	P	13	N.A.	N.A.	N.A.	-0.5	-111.8	148	188	5.7	7.2	6.2	7.7	7	This study
ASHLD 414	40.797	-76.2755	40	Pp and Pl	ENE	Quartz	MI	-126.6	5	U	11.5	N.A.	N.A.	N.A.	-0.5	-126.6	N.D.	320	N.D.	12.3	N.D.	12.8	N.D.	This study
ASHLD 511	40.7887	-76.314	39	Pp and Pl	NNW	Quartz	MI	-119.3	5	U	13.5	N.A.	N.A.	N.A.	-0.5	-119.3	288	290	11.1	11.2	11.6	11.7	11.6	This study
MTCAR 811	40.7859	-76.447	37	Pp and Pl	ENE	Quartz	MI	-84.8	6	U	8	N.A.	N.A.	N.A.	-0.5	-84.8	71	80	2.7	3.1	3.1	3.6	3.4	This study
MTCAR 812	40.7859	-76.447	37	Pp and Pl	NNE	Quartz	MI	-98.9	5	U	16	N.A.	N.A.	N.A.	-0.5	-98.9	134	161	5.2	6.2	5.7	6.7	6.2	This study
SMOKN 713	40.7646	-76.5952	38	Pp and Pl	NNE	Quartz	MI	-103.2	4	U	8.5	N.A.	N.A.	N.A.	-0.5	-103.2	182	188	7	7.2	7.5	7.7	7.6	This study
SMOKN 714	40.7646	-76.5952	38	Pp and Pl	NNW	Quartz	MI	-106.8	4	U	12	N.A.	N.A.	N.A.	-0.5	-106.8	201	204	7.7	7.8	8.2	8.3	8.3	This study
SMOKN 511	40.7933	-76.5657	36	Pp and Pl	NNW	Quartz	MI	-102.5	9	U	16	N.A.	N.A.	N.A.	-0.5	-102.5	150	182	5.8	7	6.3	7.5	6.9	This study
SMOKN 51F	40.7933	-76.5657	36	Pp and Pl	N.D.	Quartz	MI	-117.1	9	U	10	N.A.	N.A.	N.A.	-0.5	-117.1	229	293	8.8	11.3	9.3	11.8	10.5	This study
TREMT 911	40.6339	-76.3973	42	Pp and Pl	ENE	Quartz	MI	-137.2	7	U	7	N.A.	N.A.	N.A.	-0.5	-137.2	335	338	12.9	13	13.4	13.5	13.4	This study
TREVR 912	40.7574	-76.6602	42	Pp and Pl	WNW	Quartz	MI	-98	7	U	0	N.A.	N.A.	N.A.	-0.2	-98	83	97	3.2	3.7	3.4	3.9	3.6	This study
TREMT 711	40.6624	-76.4795	41	Mmc	NE	Quartz	GG	N.A.	N.A.	N.A.	N.A.	111.0 - 113.1	4	U	0.5	114	97	121	3.7	4.7	3.2	4.2	3.7	This study
TREMT 811	40.6504	-76.4456	378	Mmc	ENE	Quartz	GG	N.A.	N.A.	N.A.	N.A.	151.5	6	U	0.5	155.5	137	171	5.3	6.6	4.8	6.1	5.4	This study
BLOOM 521	41.0586	-76.4297	28	Dck	NNW	Quartz	GG	N.A.	N.A.	N.A.	N.A.	145.2 - 150.0	9	P	2.06	150	135.2	169	5.2	6.5	3.14	4.44	3.79	This study
BLOOM 522	41.0586	-76.4297	28	Dck	ENE	Quartz	GG	N.A.	N.A.	N.A.	N.A.	148.0 - 153.0	3	P	2.06	153	138.32	172.9	5.32	6.65	3.26	4.59	3.925	This study
CATAS 111	40.9606	-76.4698	34	Dck	BPV	Quartz	GG	N.A.	N.A.	N.A.	N.A.	125.1	7	U	2.44	125.1	109.304	136.63	4.204	5.255	1.764	2.815	2.2895	This study
CATAS 112	40.9606	-76.4698	34	Dck	NW	Quartz	GG	N.A.	N.A.	N.A.	N.A.	139.0 - 150.0	4	P	2.44	150	135.2	169	5.2	6.5	2.76	4.06	3.41	This study
CATAS 113	40.9606	-76.4698	34	Dck	NNW	Quartz	GG	N.A.	N.A.	N.A.	N.A.	136	8	P	2.44	136	120.64	150.8	4.64	5.8	2.2	3.36	2.78	This study
SHUMA 111	40.9704	-76.3719	33	Dck	WNW	Quartz	GG	N.A.	N.A.	N.A.	N.A.	121.7 - 142.5	4	PS	0.73	142.5	127.4	159.25	4.9	6.125	4.17	5.395	4.7825	This study
BLOOM 511	41.0435	-76.4419	30	Db and Dtr	NNW	Quartz	GG	N.A.	N.A.	N.A.	N.A.	240.0 - 245.0	4	P	3.05	245	234	292.5	9	11.25	5.95	8.2	7.075	This study
BLOOM 711	41.0382	-76.4817	29	Db and Dtr	NNW	Quartz	GG	N.A.	N.A.	N.A.	N.A.	186.3 - 195.5	9	P	2.86	195.5	182.52	228.15	7.02	8.775	4.16	5.915	5.0375	This study
DANIL 922	40.8814	-76.5071	35	Db and Dtr	ENE	Quartz	GG	N.A.	N.A.	N.A.	N.A.	208	4	U	3.49	208	195.52	244.4	7.52	9.4	4.03	5.91	4.97	This study
FRIED 111	40.6069	-76.2162	44	Db and Dtr	NNE	Quartz	MI	-155.9	5	U	0	N.A.	N.A.	N.A.	4.13	-155.9	N.D.	468	N.D.	18	N.D.	13.9	N.D.	This study
FRIED 112	40.6069	-76.2162	44	Db and Dtr	NNE	Quartz	MI	-133.9	4	U	0	N.A.	N.A.	N.A.	4.13	-133.9	N.D.	330	N.D.	12.7	N.D.	8.6	N.D.	This study
MILVL 411	41.0759	-76.5165	26	Db and Dtr	N.D.	Quartz	MI	-118.4	6	P	0	N.A.	N.A.	N.A.	2.49	-118.4	193	240	7.42308	9.23077	4.71	6.71	5.71	This study
MILVL 711	41.0132	-76.6102	27	Db and Dtr	NNE	Quartz	GG	N.A.	N.A.	N.A.	N.A.	229.8	3	PS	2.98	229.8	218.192	272.74	8.392	10.49	5.412	7.51	6.461	This study
SYBRT 112	41.1035	-76.0985	375	Db and Dtr	NNE	Quartz	GG	N.A.	N.A.	N.A.	N.A.	205	6	P	3.21	205	192.4	240.5	7.4	9.25	4.19	6.04	5.115	This study
PGROV 931	40.5389	-76.3997	45	Dm and Dmt	FV	Quartz	GG	N.A.	N.A.	N.A.	N.A.	131	6	PS	4.72	131	115.44	144.3	4.44	5.5	-0.28	0.78	0.4	This study
SWRTA 521	40.5795	-76.3249	43	Dm and Dmt	NE	Quartz	GG	N.A.	N.A.	N.A.	N.A.	133 - 134	2	U	5.02	134	119	148.2	4.56	5.7	-0.46	0.68	0.11	This study
SWRTA 522	40.5795	-76.3249	43	Dm and Dmt	NW	Quartz	GG	N.A.	N.A.	N.A.	N.A.	243	6	U	5.02	243	232	289.9	8.92	11.15	3.9	6.13	5.015	This study
MIFFL 713	41.0304	-76.3494	373	Sto	FV		GG	N.A.	N.A.	N.A.	N.A.	145.3	5	P	5.19	145.3	130.312	162.89	5.012	6.265	-0.178	1.075	0.4485	This study
MIFFL 715	41.0304	-76.3494	373	Sto	NNW		GG	N.A.	N.A.	N.A.	N.A.	158	4	P	5.19	158	143.52	179.4	5.52	6.9	0.33	1.71	1.02	This study
BLOOM 721	41.0252	-76.4581	31	Sb	NE	Quartz	GG	N.A.	N.A.	N.A.	N.A.	130.0 -138.0	2	P	4.69	138	122.72	153.4	4.72	5.9	0.03	1.21	0.62	This study
DANIL 111	40.9722	-76.6168	32	Scl	NNW	Quartz	GG	N.A.	N.A.	N.A.	N.A.	123.5 - 138.8	8	P	4.78	138.8	123.552	154.44	4.752	5.94	-0.028	1.16	0.566	This study
DANIL 112	40.9722	-76.6168	32	Scl	NNE	Quartz	GG	N.A.	N.A.	N.A.	N.A.	105	4	P	4.78	105	88.4	110.5	3.4	4.25	-1.38	-0.53	-0.955	This study
LINDN 41 LI4	41.2039	-77.1375	380	Oj	N.D.	Quartz	GG	N.A.	N.A.	N.A.	N.A.	147-187	10	U	4.14	187	173.68	217.1	6.68	8.35	2.54	4.21	3.375	Lacazette (1991)
Cross Section 4
LYKNS 511	40.5599	-76.6977	65	Mp	WNW	Quartz	GG	N.A.	N.A.	N.A.	N.A.	170.0 - 180.2	2	U	1.024	180.2	166.608	208.26	6.408	8.01	5.384	6.986	6.185	This study
COGST 511	41.2931	-77.0664	46	Dck	BPV	Quartz	GG	N.A.	N.A.	N.A.	N.A.	170.1 - 174.6	2	U	0.82	174.6	160.784	200.98	6.184	7.73	5.364	6.91	6.137	This study
COGST 512	41.2931	-77.0664	46	Dck	FV	Quartz	GG	N.A.	N.A.	N.A.	N.A.	155.7 - 162.0	2	U	0.82	162	147.68	184.6	5.68	7.1	4.86	6.28	5.57	This study
FREEB 312	40.8684	-76.889	50	Dck	NNW	Quartz	GG	N.A.	N.A.	N.A.	N.A.	153.5 - 159.5	5	U	1.74	159.5	145.08	181.35	5.58	6.975	3.84	5.235	4.5375	This study
KLING 711	40.6557	-76.7462	64	Dck	NNW	Quartz	GG	N.A.	N.A.	N.A.	N.A.	151.1 - 159.2	4	U	2.04	159.2	144.768	180.96	5.568	6.96	3.528	4.92	4.224	This study
NUMBD 812	40.8813	-76.8011	52	Dck	NNW	Quartz	GG	N.A.	N.A.	N.A.	N.A.	154.0 - 156.3	2	U	2.12	156.3	141.752	177.19	5.452	6.815	3.332	4.695	4.0135	This study
PILLO 111	40.7337	-76.8327	60	Dck	NW	Quartz	GG	N.A.	N.A.	N.A.	N.A.	151.3	2	U	1.3	151.3	136.552	170.69	5.252	6.565	3.952	5.265	4.6085	This study
PILLO 114	40.7337	-76.8327	60	Dck	WNW	Quartz	GG	N.A.	N.A.	N.A.	N.A.	171.2 - 174.6	3	U	1.3	174.6	160.784	200.98	6.184	7.73	4.884	6.43	5.657	This study
VALLY 612	40.6732	-76.6155	62	Dck	FV	Quartz	GG	N.A.	N.A.	N.A.	N.A.	106.3 - 127.3	6	U	2.36	127.3	111.592	139.49	4.292	5.365	1.932	3.005	2.4685	This study
VALLY 621	40.6771	-76.6185	63	Dck	NNW	Quartz	GG	N.A.	N.A.	N.A.	N.A.	200.7 - 201.3	2	U	2.66	201.3	188.552	235.69	7.252	9.065	4.592	6.405	5.4985	This study
SUNBY 111	40.8458	-76.874	51	Db and Dtr	NNW	Quartz	GG	N.A.	N.A.	N.A.	N.A.	135.0 - 147.3	5	U	3.76	147.3	132.392	165.49	5.092	6.365	1.332	2.605	1.9685	This study
SUNBY 112	40.8458	-76.874	51	Db and Dtr	NS	Quartz	GG	N.A.	N.A.	N.A.	N.A.	224.1 - 225.3	2	U	3.76	225.3	213.512	266.89	8.212	10.265	4.452	6.505	5.4785	This study
SUNBY 311	40.8659	-76.773	53	Db and Dtr	NNW	Quartz	GG	N.A.	N.A.	N.A.	N.A.	167	2		2.95	167	152.88	191.1	5.88	7.35	2.93	4.4	3.665	This study
TREVR 411	40.82	-76.6651	55	Db and Dtr	FV	Quartz	GG	N.A.	N.A.	N.A.	N.A.	197.3 - 211.4	5	U	3.08	211.4	199.056	248.82	7.656	9.57	4.576	6.49	5.533	This study
FREEB 911	40.765	-76.8939	58	Dm and Dmt	NNW	Quartz	GG	N.A.	N.A.	N.A.	N.A.	219.0 - 229.9	2	U	3.75	229.9	218.296	272.87	8.396	10.495	4.646	6.745	5.6955	This study
MNTRS 81 LANDS Core 17	41.1395	-76.9594	47	Dm and Dmt	N.D.	Quartz	MI	-95.1	5	P	0	N.A.	N.A.	N.A.	3.37	-95.1	72	82	2.76923	3.15385	-0.600769	-0.216154	-0.408462	Evans et al. (2014)
NUMBD 21 ERB core 833.0	40.9864	-76.8304	48	Dm and Dmt	N.D.	Quartz	MI	-114.9	13	P	0	N.A.	N.A.	N.A.	3.69	-114.9	172	210	6.61538	8.07692	2.91	4.41	3.66	Evans et al. (2014)
NUMBD 21 ERB core845.6	40.9864	-76.8304	48	Dm and Dmt	N.D.	Quartz	MI	-108	5	PS	0	N.A.	N.A.	N.A.	3.69	-108	133	160	5.11538	6.15385	1.41	2.51	1.96	Evans et al. (2014)
PILLO 411	40.6968	-76.7896	61	Dm and Dmt	NW	Quartz	GG	N.A.	N.A.	N.A.	N.A.	159.3 - 162.0	2	U	4.2	162	147.68	184.6	5.68	7.1	1.48	2.9	2.19	This study
PILLO 412	40.6968	-76.7896	61	Dm and Dmt	WNW	Quartz	GG	N.A.	N.A.	N.A.	N.A.	163.0 - 175.2	4	U	4.2	175.2	161.408	201.76	6.208	7.76	2.008	3.56	2.784	This study
SUNBY 32 ADAMS Core 26	40.8399	-76.7542	54	Dm and Dmt	N.D.	Quartz	GG	N.A.	N.A.	N.A.	N.A.	229.6 - 236.5	2	U	4.25	236.5	225.16	281.45	8.66	10.825	4.41	6.575	5.4925	Evans et al. (2014)
SUNBY 32 ADAMS Core 27	40.8399	-76.7542	54	Dm and Dmt	N.D.	Quartz	MI	-123.2	4	PS	0	N.A.	N.A.	N.A.	4.25	-123.2	N.D.	240	N.D.	9.23077	N.D.	4.98077	N.D.	Evans et al. (2014)
SUNBY 32 ADAMS Core 28	40.8399	-76.7542	54	Dm and Dmt	N.D.	Quartz	MI	-122.1	5	P	0	N.A.	N.A.	N.A.	4.25	-122.1	N.D.	225	N.D.	8.65385	N.D.	4.40385	N.D.	Evans et al. (2014)
SUNBY 32 ADAMS Core 31	40.8399	-76.7542	54	Dm and Dmt	N.D.	Quartz	MI	-123.2	6	P	0	N.A.	N.A.	N.A.	4.25	-123.2	N.D.	240	N.D.	9.23077	N.D.	4.98077	N.D.	Evans et al. (2014)
INGAP 311	40.4825	-76.5362	66	Dor	NW	Quartz	GG	-136.7	9	U	0	N.A.	N.A.	N.A.	5.31	-136.7	N.D.	370	N.D.	14.2	N.D.	9.3	N.D.	This study
FREEB 821	40.7551	-76.9366	59	Dhl	FV	Quartz	GG	N.A.	N.A.	N.A.	N.A.	200.0 - 209.4	2	U	4.2	209.4	196.976	246.22	7.576	9.47	3.376	5.27	4.323	This study
FREEB 631	40.7936	-76.9646	56	Scl	NNE	Quartz	GG	N.A.	N.A.	N.A.	N.A.	112.0 - 130.0	4	U	4.82	130	114.4	143	4.4	5.5	-0.42	0.68	0.13	This study
FREEB 632	40.7936	-76.9646	56	Scl	NNW	Quartz	GG	N.A.	N.A.	N.A.	N.A.	123.4 - 137.7	7	U	4.82	137.7	122.408	153.01	4.708	5.885	-0.112	1.065	0.4765	This study
FREEB 811	40.7811	-76.9225	57	Scl	NNW	Quartz	GG	N.A.	N.A.	N.A.	N.A.	144.2	6	P	4.75	144.2	129.168	161.46	4.968	6.21	0.218	1.46	0.839	This study
FREEB 812	40.7811	-76.9225	57	Scl	NW	Quartz	GG	N.A.	N.A.	N.A.	N.A.	117.8 - 139.3	4	U	4.75	139.3	124.072	155.09	4.772	5.965	0.022	1.215	0.6185	This study
Cross Section 5
HALFX 411	40.4421	-76.8914	96	Dck	WNW	Quartz	MI	N.A.	N.A.	N.A.	N.A.	225.0 - 232.4	3	U	2.74	232	220.48	275.6	8.48	10.6	5.74	7.86	6.8	This study
NWPRT 312	40.4801	-77.1272	97	Dck	NW	Quartz	GG	N.A.	N.A.	N.A.	N.A.	118.6	6	U	2.63	118.6	102.544	128.18	3.944	4.93	1.314	2.3	1.807	This study
RICHF 911	40.6649	-77.0361	89	Dck	NNW	Quartz	GG	N.A.	N.A.	N.A.	N.A.	102.0 - 107.4	5	U	2.73	107.4	90.896	113.62	3.496	4.37	0.766	1.64	1.203	This study
DALTA 711	40.6644	-76.9716	90	Db and Dtr	NNW	Quartz	GG	N.A.	N.A.	N.A.	N.A.	99.4 - 107.2	4	U	3.2	107.2	90.688	113.36	3.488	4.36	0.288	1.16	0.724	This study
MDLBG 431	40.8102	-77.0267	84	Db and Dtr	NNW	Quartz	GG	N.A.	N.A.	N.A.	N.A.	176.4 - 184.7	2		3.08	184.7	171.288	214.11	6.588	8.235	3.508	5.155	4.3315	This study
MILLR 241	40.6168	-77.1955	92	Db and Dtr	NW	Quartz	MI	-121.3	6	P	0	N.A.	N.A.	N.A.	3.42	-121.3	N.D.	217	N.D.	8.34615	N.D.	4.88	4.9	This study
MILLR 921	40.535	-77.1501	95	Db and Dtr	NNW	Quartz	GG	N.A.	N.A.	N.A.	N.A.	148.0 - 154.0	5	P	3.78	154	139.36	174.2	5.36	6.7	1.58	2.92	2.25	This study
BVRTN 711	40.7524	-77.2118	86	Dm and Dmt	NNW	Quartz	MI	-102.1	10	P	0	N.A.	N.A.	N.A.	3.61	-102.1	104	123	4	4.73077	0.39	1.09	0.74	This study
BVRTN 811	40.791	-77.2054	82	Dm and Dmt	NNW	Calcite	MI	-99.9	6	P	0	N.A.	N.A.	N.A.	3.47	-99.9	93	109	3.57692	4.19231	0.13	0.73	0.43	This study
BVRTN 812	40.791	-77.2054	82	Dm and Dmt	N.D.	Quartz	GG	N.A.	N.A.	N.A.	N.A.	199.0 - 201.0	7	P	3.47	201	188.24	235.3	7.24	9.05	3.77	5.58	4.675	This study
DALTA 721	40.6477	-76.9652	91	Dm and Dmt	NNW	Quartz	GG	N.A.	N.A.	N.A.	N.A.	186.3 - 194.5	5	U	3.7	194.5	181.48	226.85	6.98	8.725	3.28	5.025	4.1525	This study
MDLBG 411	40.8028	-77.0245	85	Dm and Dmt	NNW	Quartz	GG	N.A.	N.A.	N.A.	N.A.	219.2 - 223.4	2	U	3.58	223.4	211.536	264.42	8.136	10.17	4.556	6.59	5.573	This study
MDLBG 73F	40.7927	-77.1156	83	Dm and Dmt	N.D.	Quartz	GG	N.A.	N.A.	N.A.	N.A.	186.8 - 212.0	6	U	3.55	212	199.68	249.6	7.68	9.6	4.13	6.05	5.09	This study
MILLR 931	40.5381	-77.1523	94	Dm and Dmt	NW	Quartz	GG	N.A.	N.A.	N.A.	N.A.	165.5	7	P	4.08	165.5	151.32	189.15	5.82	7.275	1.74	3.195	2.4675	This study
RICHF 313	40.7182	-77.0012	88	Dm and Dmt	BPV	Quartz	MI	-96.1	6	U	0	N.A.	N.A.	N.A.	3.73	-96.1	77	82	2.96154	3.15385	-0.73	-0.53	-0.63	This study
WERTZ 411	40.3144	-77.0005	98	Dm and Dmt	BPV	Quartz	MI	-136.5	9	P	0	N.A.	N.A.	N.A.	4.86	-136.5	N.D.	366	N.D.	14.1	N.D.	9.2	N.D.	This study
MILLR 941	40.5442	-77.1571	93	Dor	WNW	Quartz	MI	-101.5	26	U	0	N.A.	N.A.	N.A.	4.28	-101.5	100	118	3.84615	4.53846	-0.48	0.22	-0.13	This study
RICHF 321	40.7258	-77.0181	87	Dhl	BPV	Quartz	GG	N.A.	N.A.	N.A.	N.A.	185.0 - 198.9	2	U	4.28	198.9	186.056	232.57	7.156	8.945	2.876	4.665	3.7705	This study
MIFLB 813	40.902	-77.0835	78	Sto	BPV	Calcite	GG	N.A.	N.A.	N.A.	N.A.	163.9 - 164.4	9	PS	4.3	164.4	150.176	187.72	5.776	7.22	1.476	2.92	2.198	This study
HARTL 222	40.9811	-77.184	76	St	NW	Quartz	GG	N.A.	N.A.	N.A.	N.A.	121.0 - 131.1	8	P	4.46	131	115.44	144.3	4.44	5.55	-0.02	1.09	0.535	This study
WEIKR 211	40.8344	-77.3234	80	St	NNW	Quartz	GG	N.A.	N.A.	N.A.	N.A.	146.5	4	P	4.58	146.5	131.56	164.45	5.06	6.325	0.48	1.745	1.1125	This study
WEIKR 421	40.813	-77.2683	81	St	WNW	Quartz	GG	N.A.	N.A.	N.A.	N.A.	186.5	5	U	4.58	186.5	173.16	216.45	6.66	8.325	2.08	3.745	2.9125	This study
WLMST 111	41.0962	-77.1229	73	St	NS	Quartz	GG	N.A.	N.A.	N.A.	N.A.	149	5	P	4.39	149	134.16	167.7	5.16	6.45	0.77	2.06	1.415	This study
WLMST 113	41.0962	-77.1229	73	St	NNW	Quartz	GG	N.A.	N.A.	N.A.	N.A.	118	6	P	4.39	118	101.92	127.4	3.92	4.9	-0.47	0.51	0.02	This study
BVRTN 211	40.846	-77.184	79	Oj	NNE	Quartz	GG	N.A.	N.A.	N.A.	N.A.	144.0 - 147.0	7	U	4.9	147	132.08	165.1	5.08	6.35	0.18	1.45	0.815	This study
HARTL 611	40.9282	-77.2411	77	Oj	N.D.	Quartz	GG	N.A.	N.A.	N.A.	N.A.	145.8	8	P	4.76	145.8	130.832	163.54	5.032	6.29	0.272	1.53	0.901	This study
CAROL 11 CA4	41.0986	-77.2433	71	Obe	N.D.	Quartz	GG	-104.8	53	U	0	N.A.	N.A.	N.A.	4.76	-104.8	199	232.7	7.65385	8.95	2.89385	4.19	3.54192	Lacazette (1991)
CAROL 411	41.0042	-77.1369	72	Obe	FV	Quartz	GG	N.A.	N.A.	N.A.	N.A.	136.6 - 144.2	6	U	4.76	144.2	129.168	161.46	4.968	6.21	0.208	1.45	0.829	This study
CAROL 62 CA1	41.0564	-77.21	74	Obe	N.D.	Quartz	GG	-128.1	133	U	0	N.A.	N.A.	N.A.	4.76	-128.1	N.D.	262	N.D.	10.1	N.D.	5.3	N.D.	Lacazette (1991)
CAROL 921	41.0241	-77.1296	75	Obe	N.D.	Quartz	MI	-101.3	3	P	0	N.A.	N.A.	N.A.	4.76	-101.3	100	116	3.84615	4.46154	-0.96	-0.26	-0.61	This study
LINDN 711	41.1573	-77.2143	69	Ot and Obr	NNE	Calcite	GG	N.A.	N.A.	N.A.	N.A.	174.4 - 175.0	10	PS	5.44	175	161.2	201.5	6.2	7.75	0.76	2.31	1.535	This study
LINDN 713	41.1573	-77.2143	69	Ot and Obr	ENE	Calcite	GG	N.A.	N.A.	N.A.	N.A.	168	3	U	5.44	168	153.92	192.4	5.92	7.4	0.48	1.96	1.22	This study
LINDN 721	41.1563	-77.2228	68	Ot and Obr	NE	Quartz	GG	N.A.	N.A.	N.A.	N.A.	178.0 - 185.7	18	PS	5.24	187.5	174.2	217.75	6.7	8.375	1.46	3.135	2.2975	This study
LOGAN 911	41.0397	-77.2688	370	Ot and Obr	NE	Calcite	GG	N.A.	N.A.	N.A.	N.A.	164.9	2	P	5.65	164.9	150.696	188.37	5.796	7.245	0.146	1.595	0.8705	This study
MILLH 125	41.0851	-77.4742	67	Ot and Obr	BPV	Calcite	GG	N.A.	N.A.	N.A.	N.A.	170.1 - 179.8	2	PS	5.26	179.8	166.192	207.74	6.392	7.99	1.132	2.73	1.931	This study
MILLH 222	41.0814	-77.4809	70	Ob	NS	Calcite	GG	N.A.	N.A.	N.A.	N.A.	136.6	3	P	5.26	136.6	121.264	151.58	4.664	5.83	-0.596	0.57	-0.013	This study
Cross Section 6
SDALE 62F	40.3305	-77.2164	117	Db and Dtr	NW	Quartz	GG	N.A.	N.A.	N.A.	N.A.	118	8	P	3.53	118	101.92	127.4	3.92	4.9	0.39	1.37	0.88	This study
ICKES 311B	40.4883	-77.2906	374	Dm and Dmt	NNW	Quartz	GG	N.A.	N.A.	N.A.	N.A.	160.5	3	P	3.99	160.5	146.12	182.65	5.62	7.025	1.63	3.035	2.3325	This study
ICKES 513	40.4427	-77.3308	114	Dm and Dmt	FV	Quartz	MI	-110.2	15	P	0	N.A.	N.A.	N.A.	3.79	-110.2	142	172	5.46154	6.61538	1.67154	2.82538	2.24846	This study
NWPRT 722	40.4245	-77.2378	115	Dm and Dmt	NNW	Quartz	GG	N.A.	N.A.	N.A.	N.A.	124	4	U	4.46	124	108.16	135.2	4.16	5.2	-0.3	0.74	0.22	This study
BURNM 813	40.6413	-77.5579	110	Swc and Smc	NE	Calcite	GG	N.A.	N.A.	N.A.	N.A.	135.6 - 140.1	5	P	4.1	140.1	124.904	156.13	4.804	6.005	0.704	1.905	1.3045	This study
LANDI 112	40.3525	-77.3364	116	Scl	FV	Quartz	GG	N.A.	N.A.	N.A.	N.A.	126.5	7	P	4.97	126.5	110.76	138.45	4.26	5.325	-0.71	0.355	-0.1775	This study
MCLUR 811	40.6502	-77.2935	112	Scl	FV	Quartz	GG	N.A.	N.A.	N.A.	N.A.	152.2 - 160.2	4	U	4.46	160.2	145.808	182.26	5.608	7.01	1.148	2.55	1.849	This study
MFLTN 912	40.5355	-77.399	113	Scl	NNW	Quartz	GG	N.A.	N.A.	N.A.	N.A.	160	5	U	4.49	160	145.6	182	5.6	7	1.11	2.51	1.81	This study
COBUR 211	40.8505	-77.4536	106	Oj	NNW	Quartz	GG	N.A.	N.A.	N.A.	N.A.	207.5	1	P	4.81	207.5	195	243.75	7.5	9.375	2.69	4.565	3.6275	This study
MADIS 212	40.9815	-77.5427	101	Obe	NNW	Quartz	MI	-127.1	6	U	0				4.72	-127.1	N.D.	267	N.D.	10.3	N.D.	5.6	N.D.	This study
MCLUR 421	40.6831	-77.2794	111	Obe	FV	Quartz	MI	-126.9	8	P	0	N.A.	N.A.	N.A.	5.25	-126.9	N.D.	270	N.D.	10.4	N.D.	5.1	N.D.	This study
CHALL 423	40.8133	-77.6276	103	Om	N.D.	Quartz	MI	-129.3	8	P	0	N.A.	N.A.	N.A.	5.17	-129.3	N.D.	285	N.D.	11	N.D.	5.8	N.D.	This study
COBUR 121	40.8476	-77.4964	105	Om	NNW	Quartz	GG	N.A.	N.A.	N.A.	N.A.	222.3	2	PS	5.3	222.3	210.392	262.99	8.092	10.115	2.792	4.815	3.8035	This study
BURNM 123	40.7107	-77.5922	107	Ot	NE	Quartz	GG	N.A.	N.A.	N.A.	N.A.	207	3	P	5.65	207	194.48	243.1	7.48	9.35	1.83	3.7	2.765	This study
BURNM 511	40.6786	-77.5745	109	Ot and Obr	NE	Quartz	GG	N.A.	N.A.	N.A.	N.A.	134.2 - 140.1	3	PS	5.65	140.1	124.904	156.13	4.804	6.005	-0.846	0.355	-0.2455	This study
BURNM 513	40.6786	-77.5745	109	Ot and Obr	FV	Calcite	MI	-104	5	P	0	N.A.	N.A.	N.A.	5.54	-104	110	120	4.23077	4.61538	-1.34	-0.0784615	-0.709231	This study
BURNM 515	40.6786	-77.5745	109	Ot and Obr	ENE	Calcite	GG	N.A.	N.A.	N.A.	N.A.	233.0 - 234.0	3	P	5.65	234	222.56	278.2	8.56	10.7	2.91	5.05	3.98	This study
BURNM 521	40.6764	-77.5778	108	Ot and Obr	FV	Calcite	MI	-115.3	12	P	0	N.A.	N.A.	N.A.	5.65	-115.3	173	215	6.65385	8.26923	1.00385	2.61923	1.81154	This study
COBUR 112	40.8533	-77.4984	104	Ot and Obr	NE	Calcite	MI	-87.4	7	P	0	N.A.	N.A.	N.A.	5.6	-87.4	45	48	1.73077	1.84615	-3.86923	-3.75385	-3.81154	This study
MINGO 313	40.9892	-77.6398	99	Ot and Obr	ENE	Calcite	GG	N.A.	N.A.	N.A.	N.A.	117.9 - 126.5	10	U	5.41	126.5	110.76	138.45	4.26	5.325	-1.15	-0.085	-0.6175	This study
MINGO 314	40.9892	-77.6398	99	Ot and Obr	NE	Calcite	GG	N.A.	N.A.	N.A.	N.A.	110.5 - 126.7	10	U	5.41	126.7	110.968	138.71	4.268	5.335	-1.142	-0.075	-0.6085	This study
MINGO 316	40.9892	-77.6398	99	Ot and Obr	NW	Calcite	MI	-88.9	29	U	0	N.A.	N.A.	N.A.	5.41	-88.9	53	59	2.03846	2.26923	-3.37154	-3.14077	-3.25615	This study
BELFT 921	40.9102	-77.7841	100	Ob	NNW	Calcite	GG	N.A.	N.A.	N.A.	N.A.	119.0 - 123.5	7	PS	5.5	123.5	107.64	134.55	4.14	5.175	-1.36	-0.325	-0.8425	This study
SMILL 214	40.8565	-77.5725	102	Ob	BPV	Calcite	MI	-117	11	P	0	N.A.	N.A.	N.A.	5.74	-117	186	231	7.15385	8.88462	1.46	3.16	2.31	This study
Cross Section 7
BLAIR 321	40.3642	-77.6622	137	Dck	FV	Quartz	GG	N.A.	N.A.	N.A.	N.A.	178.1	7	P	2.38	178.1	164.424	205.53	6.324	7.905	3.944	5.525	4.7345	This study
ALLEN 622	40.5764	-77.8533	129	Dm and Dmt	NW	Quartz	GG	N.A.	N.A.	N.A.	N.A.	222	4	P	3.21	222	210.08	262.6	8.08	10.1	4.87	6.89	5.88	This study
BEARK 911	40.8901	-77.8993	118	Dm and Dmt	BPV	Calcite	GG	125.6 (LHI***)	6	P	0	N.A.	N.A.	N.A.	2.55	125.6	109.824	137.28	4.224	5.28	1.674	2.73	2.202	This study
MCCOY 511	40.4166	-77.5623	138	Dm and Dmt	NNW	Quartz	MI	-95.5	10	PS	0	N.A.	N.A.	N.A.	3.53	-95.5	76	87	2.92308	3.34615	-0.63	-0.23	-0.43	This study
SPRCE 911	40.3779	-77.3896	143	Dm and Dmt	NNW	Quartz	GG	N.A.	N.A.	N.A.	N.A.	137.5 - 149.4	4	U	3.91	149.4	134.576	168.22	5.176	6.47	1.266	2.56	1.913	This study
NEWTN 311	40.4793	-77.7726	135	Dhl	NNW	Quartz	GG	N.A.	N.A.	N.A.	N.A.	195.8	9	P	3.52	195.8	182.832	228.54	7.032	8.79	3.512	5.27	4.391	This study
ALLEN 921	40.508	-77.7893	133	Swc and Smc	BPV	Quartz	GG	N.A.	N.A.	N.A.	N.A.	218.8	4	U	3.88	218.8	206.752	258.44	7.952	9.94	4.072	6.06	5.066	This study
LEWIS 523	40.5744	-77.5816	134	Swc and Smc	ENE	Quartz	GG	N.A.	N.A.	N.A.	N.A.	141.7 - 151.2	2	U	4.23	151.2	136.448	170.56	5.248	6.56	1.018	2.33	1.674	This study
MCALE 521	40.6684	-77.7946	126	Sb	NW	Quartz	GG	N.A.	N.A.	N.A.	N.A.	120.3	3	P	4.06	120.3	104.312	130.39	4.012	5.015	-0.048	0.955	0.4535	This study
ANDER 631	40.3205	-77.4753	142	Scl	WNW	Quartz	GG	N.A.	N.A.	N.A.	N.A.	108.6 - 123.5	10	P	4.7	123.5	107.64	134.55	4.14	5.175	-0.56	0.475	-0.0425	This study
BARRV 612	40.7024	-77.7235	124	Scl	FV	Quartz	GG	N.A.	N.A.	N.A.	N.A.	123.3	5	P	4.22	123.3	107.432	134.29	4.132	5.165	-0.088	0.945	0.4285	This study
DONAT 311	40.6192	-77.9023	125	Scl	NW	Quartz	GG	N.A.	N.A.	N.A.	N.A.	98.6 - 128.8	10	U	4	128.8	113.152	141.44	4.352	5.44	0.352	1.44	0.896	This study
MCALE 821	40.6434	-77.809	127	Scl	NNW	Quartz	GG	N.A.	N.A.	N.A.	N.A.	150.3	2	U	4.16	150.3	135.512	169.39	5.212	6.515	1.052	2.355	1.7035	This study
BLAIN 611	40.3196	-77.5955	140	St	NNW	Quartz	GG	N.A.	N.A.	N.A.	N.A.	121	3	P	4.85	121	105.04	131.3	4.04	5.05	-0.81	0.2	-0.305	This study
SPRCE 815	40.4086	-77.4435	141	St	FV	Quartz	GG	N.A.	N.A.	N.A.	N.A.	169	3	U	5.03	169	154.96	193.7	5.96	7.45	0.93	2.42	1.675	This study
ALLEN 931	40.5401	-77.762	131	Oj	NNE	Quartz	GG	N.A.	N.A.	N.A.	N.A.	171.2 - 179.8	6	U	4.68	179.8	166.192	207.74	6.392	7.99	1.712	3.31	2.511	This study
MCVEY 512	40.457	-77.706	136	Oj	NW	Quartz	GG	N.A.	N.A.	N.A.	N.A.	190.1	6	U	4.71	190.1	176.904	221.13	6.804	8.505	2.094	3.795	2.9445	This study
MCVEY 514	40.457	-77.706	136	Oj	N.D.	Quartz	GG	N.A.	N.A.	N.A.	N.A.	176.9 - 186.7	2	P	4.71	186.7	173.368	216.71	6.668	8.335	1.958	3.625	2.7915	This study
BARRV 811	40.6599	-77.6999	128	Obe	N.D.	Quartz	MI	-118.8	7	P	0	N.A.	N.A.	N.A.	4.97	-118.8	190	242	7.30769	9.30769	2.33769	4.33769	3.33769	This study
BELVL 621	40.5585	-77.7446	132	Obe	NNW	Quartz	GG	N.A.	N.A.	N.A.	N.A.	184.3 - 186.6	2	U	4.93	186.6	173.264	216.58	6.664	8.33	1.734	3.4	2.567	This study
BELVL 622	40.5585	-77.7446	132	Obe	NW	Quartz	GG	N.A.	N.A.	N.A.	N.A.	157.8 - 166.9	3	U	4.93	166.9	152.776	190.97	5.876	7.345	0.946	2.415	1.6805	This study
CHALL 821	40.7531	-77.7055	123	Obe	NNW	Quartz	GG	N.A.	N.A.	N.A.	N.A.	154	3	PS	4.87	154	139.36	174.2	5.36	6.7	0.49	1.83	1.16	This study
BLAIN 111	40.3441	-77.5957	139	Om	NE	Quartz	MI	-98.5	15	P	0	N.A.	N.A.	N.A.	5.29	-98.5	88	100	3.38462	3.84615	-1.90538	-1.44385	-1.67462	This study
BELFT 822	40.8898	-77.7948	121	Ot and Obr	WNW	Calcite	GG	N.A.	N.A.	N.A.	N.A.	140.2 - 144.0	17	PS	6.5	144	128.96	161.2	4.96	6.2	-1.54	-0.3	-0.92	This study
BELFT 841	40.8936	-77.7946	120	Ot and Obr	NW	Calcite	GG	N.A.	N.A.	N.A.	N.A.	140.1 - 168.0	3	P	6.5	168	153.92	192.4	5.92	7.4	-0.58	0.9	0.16	This study
JULIA 323	40.8594	-77.8753	119	Ot and Obr	NNW	Calcite	GG	N.A.	N.A.	N.A.	N.A.	91.7 - 123.2	6	U	6.18	123.2	107.328	134.16	4.128	5.16	-2.052	-1.02	-1.536	This study
JULIA 324	40.8594	-77.8753	119	Ot and Obr	NW	Calcite	GG	N.A.	N.A.	N.A.	N.A.	138.3 - 153.0	11	U	6.18	153	138.32	172.9	5.32	6.65	-0.86	0.47	-0.195	This study
JULIA 325	40.8594	-77.8753	119	Ot and Obr	ENE	Calcite	GG	N.A.	N.A.	N.A.	N.A.	100.7	1	U	6.18	100.7	83.928	104.91	3.228	4.035	-2.952	-2.145	-2.5485	This study
STCOL 51 CFV	40.8097	-77.8256	122	Ob	N.D.	Calcite	GG	N.A.	N.A.	N.A.	N.A.	109.0 - 140.5	24	U	5.54	140.5	125.32	156.65	4.82	6.025	-0.72	0.485	-0.1175	Srivistava & Engelder (1991)
STCOL 51 SV	40.8097	-77.8256	122	Ob	N.D.	Calcite	GG	N.A.	N.A.	N.A.	N.A.	131.0 - 168.0	25	U	5.54	168	153.92	192.4	5.92	7.4	0.38	1.86	1.12	Srivistava & Engelder (1991)
BARRV 921	40.6587	-77.6459	130	Ob	NNW	Calcite	GG	N.A.	N.A.	N.A.	N.A.	169.3 - 171.0	3	PS	6.52	171	157.04	196.3	6.04	7.55	-0.48	1.03	0.275	This study
BARRV 923	40.6587	-77.6459	130	Ob	BPV	Calcite	GG	N.A.	N.A.	N.A.	N.A.	142.6	3	P	6.52	142.6	127.504	159.38	4.904	6.13	-1.616	-0.39	-1.003	This study
Cross Section 8
MTUNI 812	40.4054	-77.955	157	Dch	NNE	Quartz	GG	100.2 (LHI)	17	U	0	N.A.	N.A.	N.A.	1.97	100.2	83.408	104.26	3.208	4.01	1.238	2.04	1.639	This study
DONAT 911	40.5049	-77.8919	158	Db and Dtr	NW	Quartz	MI	-102.3	13	U	0	N.A.	N.A.	N.A.	2.51	-102.3	99	115	3.80769	4.42308	1.29769	1.91308	1.60538	This study
DONAT 912	40.5049	-77.8919	158	Db and Dtr	NW	Quartz	MI	-93.1	26	U	0	N.A.	N.A.	N.A.	2.51	-93.1	67	74	2.57692	2.84615	0.09	0.29	0.19	This study
HUNTD 35 HU1	40.4774	-77.9995	156	Db and Dtr	N.D.	Quartz	GG	N.A.	N.A.	N.A.	N.A.	N.A.	N.A.	N.A.	2.64	211	198.64	248.3	7.64	9.55	5	6.91	5.955	Lacazette (1991)
HUNTD 351	40.4774	-77.9995	156	Db and Dtr	NW	Quartz	MI	-124.4	26	PS	0	N.A.	N.A.	N.A.	2.64	-124.4	N.D.	237	N.D.	9.11538	N.D.	6.6	N.D.	This study
HUNTD 35A	40.4774	-77.9995	156	Db and Dtr	NW	Quartz	GG	N.A.	N.A.	N.A.	N.A.	199.9	4	P	2.64	199.9	187.096	233.87	7.196	8.995	4.556	6.355	5.4555	This study
HUNTD 351B	40.4774	-77.9995	156	Db and Dtr	NE	Quartz	GG	N.A.	N.A.	N.A.	N.A.	182.0 - 186.8	4	U	2.64	186.8	173.472	216.84	6.672	8.34	4.032	5.7	4.866	This study
TIPTN 931	40.6597	-78.2738	145	Db and Dtr	CONC	Quartz	GG	N.A.	N.A.	N.A.	N.A.	88.1 - 102.3	3	U	2.22	102.3	85.592	106.99	3.292	4.115	1.072	1.895	1.4835	This study
HUNTD 311	40.4866	-78.0304	154	Dm and Dmt	NW	Quartz	MI	-99.2	18	P	0	N.A.	N.A.	N.A.	3	-99.2	90	101	3.46154	3.88462	0.461538	0.884615	0.673077	This study
HUNTD 322	40.4851	-78.0261	155	Dm and Dmt	ENE	Quartz	GG	N.A.	N.A.	N.A.	N.A.	164	3	P	2.85	164	149.76	187.2	5.76	7.2	2.91	4.35	3.63	This study
NEWTN 721	40.4026	-77.8547	160	Dm and Dmt	N.D.	Quartz	GG	N.A.	N.A.	N.A.	N.A.	183.2	3	U	3.44	183.2	169.728	212.16	6.528	8.16	3.088	4.72	3.904	This study
NEWTN 72BILGER Core 1	40.4003	-77.8501	161	Dm and Dmt	N.D.	Quartz	GG	N.A.	N.A.	N.A.	N.A.	195.0 - 210.0	4	P	3.44	210	197.6	247	7.6	9.5	4.16	6.06	5.11	Evans et al. (2014)
NEWTN 72BILGER Core 9	40.4003	-77.8501	161	Dm and Dmt	N.D.	Quartz	MI	-108.4	11	P	0	N.A.	N.A.	N.A.	3.44	-108.4	137	164	5.26923	6.30769	1.86	2.86	2.36	Evans et al. (2014)
TIPTN 921	40.6623	-78.2792	144	Dm and Dmt	NNW	Barite	GG	119.8 (LHI)	1	U	N.A.-	N.A.	N.A.	N.A.	2.42	119.8	103.792	129.74	3.992	4.99	1.572	2.57	2.071	This study
AWICK 213	40.3698	-77.8099	162	Sb	NW	Quartz	GG	N.A.	N.A.	N.A.	N.A.	166.7 - 168.8	3	PS	4.08	168.8	154.752	193.44	5.952	7.44	1.872	3.36	2.616	This study
HUNTD 111	40.4642	-78.1062	153	Sb	WNW	Quartz	GG	N.A.	N.A.	N.A.	N.A.	118.7	4	P	3.8	118.7	102.648	128.31	3.948	4.935	0.148	1.135	0.6415	This study
MTUNI 912	40.3948	-77.8789	159	Sb	NNE	Quartz	GG	N.A.	N.A.	N.A.	N.A.	108.1 - 119.0	11	U	2.87	119	102.96	128.7	3.96	4.95	1.09	2.08	1.585	This study
ALEXA 114	40.5888	-78.0945	152	Scl	N.D.	Quartz	MI	-98.6	3	U	0	N.A.	N.A.	N.A.	3.86	-98.6	83	96	3.19231	3.69231	-0.667692	-0.167692	-0.417692	This study
BLAIN 711	40.2885	-77.5856	163	Scl	NW	Quartz	GG	N.A.	N.A.	N.A.	N.A.	94.5	5	P	4.65	94.5	77.48	96.85	2.98	3.725	-1.67	-0.925	-1.2975	This study
SPRCK 122	40.59	-78.2399	147	Ot and Obr	NNW	Calcite	GG	N.A.	N.A.	N.A.	N.A.	135.4 - 145.4	4	U	5.26	145.4	130.416	163.02	5.016	6.27	-0.244	1.01	0.383	This study
SPRCK 211	40.6101	-78.19	149	Ot and Obr	NNW	Calcite	GG	N.A.	N.A.	N.A.	N.A.	135.5 - 137.2	7	P	5.26	137.2	121.888	152.36	4.688	5.86	-0.572	0.6	0.014	This study
SPRCK 212	40.6101	-78.19	149	Ot and Obr	FV	Calcite	GG	N.A.	N.A.	N.A.	N.A.	140.0 - 154.0	9	P	5.26	154	139.36	174.2	5.36	6.7	0.1	1.44	0.77	This study
SPRCK 221	40.6193	-78.1734	148	Ot and Obr	NNW	Calcite	MI	-91.4	12	U	0	N.A.	N.A.	N.A.	5.26	-91.4	57	65	2.19231	2.5	-3.06	-2.76	-2.91	This study
TYRNE 712	40.6498	-78.2289	146	Ot and Obr	NW	Calcite	GG	N.A.	N.A.	N.A.	N.A.	123.6 - 145.2	4	U	5.46	145.2	130.208	162.76	5.008	6.26	-0.452	0.8	0.174	This study
SPRCK 312	40.6106	-78.1615	150	Ob	NNW	Calcite	GG	N.A.	N.A.	N.A.	N.A.	136.7 - 146	9	U	5.36	146	131.04	163.8	5.04	6.3	-0.32	0.94	0.31	This study
SPRCK 321	40.6049	-78.1362	151	Ob	NW	Calcite	GG	N.A.	N.A.	N.A.	N.A.	170.8	4	PS	5.36	170.8	156.832	196.04	6.032	7.54	0.672	2.18	1.426	This study
TYRNE 821	40.6287	-78.1794	371	Ob	NW	Calcite	GG	N.A.	N.A.	N.A.	N.A.	133.0 - 147.7	7	P	6.11	147.1	132.184	165.23	5.084	6.355	-1.026	0.245	-0.3905	This study
Cross Section 9
ENTRI 421	40.3187	-78.1275	170	Mp	FV	Quartz	GG	N.A.	N.A.	N.A.	N.A.	176.5	4	P	0.45	176.5	162.76	203.45	6.26	7.825	5.81	7.375	6.5925	This study
ENTRI 521	40.3201	-78.1763	169	Dch	NNW	Quartz	GG	N.A.	N.A.	N.A.	N.A.	118.9 - 119.5	2	P	1.93	119.5	103.48	129.35	3.98	4.975	2.05	3.045	2.5475	This study
AWICK 911	40.2794	-77.766	172	Db and Dtr	NNW	Quartz	GG	N.A.	N.A.	N.A.	N.A.	161.7	7	P	2.91	161.7	147.368	184.21	5.668	7.085	2.758	4.175	3.4665	This study
ENTRI 561	40.33	-78.1945	168	Dm and Dmt	NW	Quartz	GG	N.A.	N.A.	N.A.	N.A.	174.5 - 198.1	6	P	2.83	198.1	185.224	231.53	7.124	8.905	4.294	6.075	5.1845	This study
FRANK 622	40.4504	-78.353	166	Dhl	FV	Calcite	GG	N.A.	N.A.	N.A.	N.A.	126.9	6	U	2.93	126.9	111.176	138.97	4.276	5.345	1.346	2.415	1.8805	This study
HOLDY 333	40.493	-78.4047	164	Dhl	WNW	Calcite	GG	N.A.	N.A.	N.A.	N.A.	120.7	3	U	2.74	120.7	104.728	130.91	4.028	5.035	1.288	2.295	1.7915	This study
HOLDY 422	40.4188	-78.388	165	Dhl	NNW	Calcite	GG	N.A.	N.A.	N.A.	N.A.	126.6	1	U	2.74	126.6	110.864	138.58	4.264	5.33	1.524	2.59	2.057	This study
HOLDY 426	40.4188	-78.388	166	Dhl	NNW	Calcite	GG	N.A.	N.A.	N.A.	N.A.	113.2	5	PS	2.74	113.2	96.928	121.16	3.728	4.66	0.988	1.92	1.454	This study
SHDGP 111	40.2315	-77.8731	171	Om	BPV	Quartz	MI	-123.5	13	U	0	N.A.	N.A.	N.A.	5.2	-123.5	N.D.	240	N.D.	9.2	N.D.	4	N.D.	This study
WILLI 112	40.4749	-78.2257	167	Ob	NNW	Calcite	GG	N.A.	N.A.	N.A.	N.A.	136.5 - 139.5	4	P	5.41	139.5	124.28	155.35	4.78	5.975	-0.63	0.565	-0.0325	This study
Cross Section 10
WELTN 311 SITE 27	39.6905	-78.2986	183	Mp	N.D.	Quartz	GG	N.A.	N.A.	N.A.	N.A.	165 - 200	21	U	-0.1	200	181	224	7	8.6	7.1	8.7	7.9	Castles (2010)
WELTN 951 SITE 48	40.0113	-78.1381	184	Mp	N.D.	Quartz	GG	N.A.	N.A.	N.A.	N.A.	165 - 190	20	U	0.6	190	177	221	6.8	8.5	6.2	7.9	7.1	Castles (2010)
ORBIS 721	40.1432	-77.9738	185	Dck	FV	Quartz	GG	N.A.	N.A.	N.A.	N.A.	135.3	6	P	1.38	135.3	119.912	149.89	4.612	5.765	3.232	4.385	3.8085	This study
SAXTN 131	40.2494	-78.2299	181	Dch	FV	Quartz	GG	N.A.	N.A.	N.A.	N.A.	107.0 - 107.3	2	U	1.66	107.3	90.792	113.49	3.492	4.365	1.832	2.705	2.2685	This study
ENTRI 721	40.2909	-78.2233	180	Db and Dtr	NW	Quartz	GG	N.A.	N.A.	N.A.	N.A.	195	4	P	2.73	195	182	227.5	7	8.75	4.27	6.02	5.145	This study
BRTCB 6101	40.0748	-77.9793	186	Dm and Dmt	NW	Quartz	MI	-110.6	7	P	0	N.A.	N.A.	N.A.	3.43	-110.6	141	177	5.42308	6.80769	1.99308	3.37769	2.68538	This study
HOPEW 313	40.2159	-78.2743	182	Dm and Dmt	FV	Quartz	MI	-126.5	10	PS	0	N.A.	N.A.	N.A.	3.13	-126.5	N.D.	264	N.D.	10.1538	N.D.	7.1	N.D.	This study
RSPRG 513	40.3252	-78.4397	173	Dm and Dmt	FV	Calcite	GG	114.1 (LHI)	12	U	N.A.-	N.A.	N.A.	N.A.	2.85	114.1	97.864	122.33	3.764	4.705	0.914	1.855	1.3845	This study
RSPRG 711	40.2679	-78.4611	174	Dhl	NNW	Calcite	GG	N.A.	N.A.	N.A.	N.A.	99.1 - 108.0	8	U	3.25	108	91.52	114.4	3.52	4.4	0.27	1.15	0.71	This study
HOPEW 741	40.1431	-78.3333	379	Scl	NNW	Quartz	MI	-128.2	8	P	0	N.A.	N.A.	N.A.	4.03	-128.2	N.D.	284	N.D.	10.9	N.D.	6.9	N.D.	This study
MARTN 431A	40.2967	-78.2581	178	St	FV	Quartz	GG	N.A.	N.A.	N.A.	N.A.	159	2	U	4.227	159	144.56	180.7	5.56	6.95	1.333	2.723	2.028	This study
ROXBY 211	40.1196	-77.684	187	St	FV	Quartz	GG	N.A.	N.A.	N.A.	N.A.	184.2 - 188.7	2	U	4.9	188.7	175.448	219.31	6.748	8.435	1.848	3.535	2.6915	This study
HOPEW 511	40.1886	-78.3012	179	Obe	WNW	Quartz	GG	N.A.	N.A.	N.A.	N.A.	113.7	3	P	4.63	113.7	97.448	121.81	3.748	4.685	-0.882	0.055	-0.4135	This study
SHDGP 911	40.1298	-77.7648	188	Om	WNW	Calcite	MI	-90.3	22	P	0	N.A.	N.A.	N.A.	5.55	-90.3	60	65	2.30769	2.5	-3.24231	-3.05	-3.14615	This study
SHDGP 916	40.1298	-77.7648	188	Om	NW	Calcite	MI	-98.8	32	p	0	N.A.	N.A.	N.A.	5.55	-98.8	84	97	3.23077	3.73077	-2.31923	-1.81923	-2.06923	This study
MARTN 412	40.3035	-78.2746	177	Ot and Obr	ENE	Calcite	GG	N.A.	N.A.	N.A.	N.A.	138.0 - 139.0	4	P	5.43	139	123.76	154.7	4.76	5.95	-0.67	0.52	-0.075	This study
NEWEN 411	40.198	-78.3922	176	Ot and Obr	WNW	Calcite	GG	N.A.	N.A.	N.A.	N.A.	136	3	P	5.83	136	120.64	150.8	4.64	5.8	-1.19	-0.03	-0.61	This study
RSPRG 422	40.327	-78.3901	175	Ot and Obr	NNW	Calcite	GG	N.A.	N.A.	N.A.	N.A.	158.0 - 165.0	2	U	5.63	165	150.8	188.5	5.8	7.25	0.17	1.62	0.895	This study
RSPRG 423	40.327	-78.3901	175	Ot and Obr	NE	Calcite	GG	N.A.	N.A.	N.A.	N.A.	137.4	2	U	5.63	137	121.68	152.1	4.68	5.85	-0.95	0.22	-0.365	This study
Cross Section 11
AMARA 411	39.8014	-78.2539	205	Dck	NW	Quartz	GG	N.A.	N.A.	N.A.	N.A.	127.1	5	P	0.85	127.1	111.384	139.23	4.284	5.355	3.434	4.505	3.9695	This study
EEAST 8222 SITE 31	40.0127	-78.3166	199	Dck	N.D.	Quartz	GG	N.A.	N.A.	N.A.	2	142.0 - 175.0	15	U	1.6	175	161.2	201.5	6.2	7.75	4.6	6.15	5.375	Castles (2010)
MENCH 311	39.997	-78.2614	203	Dck	BPV	Quartz	GG	N.A.	N.A.	N.A.	N.A.	128.2	2	P	0.99	128.2	112.528	140.66	4.328	5.41	3.338	4.42	3.879	This study
MENCH 34B	39.9931	-78.2768	200	Dck	FV	Quartz	GG	N.A.	N.A.	N.A.	N.A.	114.9 - 122.5	3	U	0.89	122.5	106.6	133.25	4.1	5.125	3.21	4.235	3.7225	This study
MENCH 351 SITE 29	39.9982	-78.2633	202	Dck	N.D.	Quartz	GG	N.A.	N.A.	N.A.	2	138.0 - 170.0	14	U	1.3	170	156	195	6	7.5	4.7	6.2	5.45	Castles (2010)
MENCH 411	39.9572	-78.2534	204	Dck	FV	Quartz	GG	N.A.	N.A.	N.A.	N.A.	135.9	5	P	0.99	135.9	120.536	150.67	4.636	5.795	3.646	4.805	4.2255	This study
MENCH 412	39.9572	-78.2534	204	Dck	NE	Quartz	GG	N.A.	N.A.	N.A.	N.A.	138	3	P	0.99	138	122.72	153.4	4.72	5.9	3.73	4.91	4.32	This study
MENCH 531	39.9469	-78.3093	201	Dck	WNW	Quartz	GG	N.A.	N.A.	N.A.	N.A.	127.8 - 138.7	5	P	0.89	138.7	123.448	154.31	4.748	5.935	3.858	5.045	4.4515	This study
MENCH 532	39.9469	-78.3093	201	Dck	NE	Quartz	GG	N.A.	N.A.	N.A.	N.A.	104.5 - 109.4	3	P	0.89	109.4	92.976	116.22	3.576	4.47	2.686	3.58	3.133	This study
MENCH 533	39.9469	-78.3093	201	Dck	BPV	Quartz	GG	N.A.	N.A.	N.A.	N.A.	176.2	2	P	0.89	176.2	162.448	203.06	6.248	7.81	5.358	6.92	6.139	This study
NEEDM 611	39.7956	-78.2251	206	Dck	FV	Quartz	GG	N.A.	N.A.	N.A.	N.A.	132.1	4	P	1.18	132.1	116.584	145.73	4.484	5.605	3.304	4.425	3.8645	This study
MDGRD 211	39.986	-78.0451	212	Dch	NW	Quartz	GG	N.A.	N.A.	N.A.	N.A.	137.1	7	U	1.93	137.1	121.784	152.23	4.684	5.855	2.754	3.925	3.3395	This study
SCHLL 811	40.0411	-78.7056	368	Dch	NW	Quartz	GG	N.A.	N.A.	N.A.	N.A.	116.5	7	P	1.6	116.5	100.36	125.45	3.86	4.825	2.26	3.225	2.7425	This study
EEAST 631	40.0563	-78.347	369	Dm and Dmt	NW	Quartz	MI	-111.9	3	U	0	N.A.	N.A.	N.A.	2.88	-111.9	160	191	6.15385	7.34615	3.27385	4.46615	3.87	This study
ALUMB 923	40.1533	-78.512	192	Dm and Dmt	NNW	Quartz	GG	N.A.	N.A.	N.A.	N.A.	97.1 - 105.5	6	U	2.89	105.5	88.92	111.15	3.42	4.275	0.53	1.385	0.9575	This study
BEDFD 241	40.1208	-78.5781	190	Dm and Dmt	NNE	Quartz	MI	-100.5	24	U	0	N.A.	N.A.	N.A.	2.87	-100.5	108	125	4.15385	4.80769	1.28385	1.93769	1.61077	This study
BEDFD 661	40.0759	-78.6024	189	Dm and Dmt	CONC	Calcite	GG	N.A.	N.A.	N.A.	N.A.	101.3 - 110.0	7	U	2.9	110	93.6	117	3.6	4.5	0.7	1.6	1.15	This study
BIGCT 321	39.8578	-78.0418	213	Dm and Dmt	FV	Quartz	MI	-101.5	8	U	0	N.A.	N.A.	N.A.	3.53	-101.5	102	119	3.92308	4.57692	0.37	1.07	0.72	This study
BIGCT 911	39.7606	-78.0196	216	Dm and Dmt	FV	Quartz	MI	-110.1	90	U	0	N.A.	N.A.	N.A.	3.51	-110.1	161	199	6.19231	7.65385	2.68231	4.14385	3.41308	This study
BUFMI 341	39.974	-78.6298	191	Dm and Dmt	N.D.	Quartz	GG	N.A.	N.A.	N.A.	N.A.	84.0 - 97.7	5	U	3.17	97.7	80.808	101.01	3.108	3.885	-0.062	0.715	0.3265	This study
CLEAR 323	39.9807	-78.3868	198	Dm and Dmt	NW	Quartz	MI	-106	4	U	0	N.A.	N.A.	N.A.	3.14	-106	124	145	4.76923	5.57692	1.62923	2.43692	2.03308	This study
CLEAR 325	39.9807	-78.3868	198	Dm and Dmt	FV	Quartz	GG	N.A.	N.A.	N.A.	N.A.	200	2	U	3.14	200	187.2	234	7.2	9	4.06	5.86	4.96	This study
MDGRD 611	39.954	-78.0944	208	Dm and Dmt	WNW	Quartz	MI	-120.2	12	U	0	N.A.	N.A.	N.A.	3.53	-120.2	206	260	7.92308	10	4.39308	6.47	5.43154	This study
MDGRD 62F	39.9565	-78.1043	207	Dm and Dmt	WNW	Quartz	MI	-117.9	4	U	0	N.A.	N.A.	N.A.	3.53	-117.9	192	235	7.38462	9.03846	3.87	5.47	4.67	This study
NEEDM 911	39.7605	-78.1658	211	Dm and Dmt	FV	Barite	GG	N.A.	N.A.	N.A.	N.A.	113.9 - 132.8	3	P	3.53	132.8	117.312	146.64	4.512	5.64	0.982	2.11	1.546	This study
HANCK 214	39.7483	-78.1726	210	Dor	NE	Calcite	GG	N.A.	N.A.	N.A.	N.A.	150.1 - 165.1	5	U	3.65	165.1	150.904	188.63	5.804	7.255	2.154	3.605	2.8795	This study
ALUMB 931	40.1473	-78.5104	193	Dhl	BPV	Calcite	GG	N.A.	N.A.	N.A.	N.A.	135.0 - 142.0	4	U	3.29	142	126.88	158.6	4.88	6.1	1.59	2.81	2.2	This study
ALUMB 936	40.1473	-78.5104	193	Dhl	NNW	Calcite	GG	N.A.	N.A.	N.A.	N.A.	122.0 - 133.0	6	U	3.29	133	117.52	146.9	4.52	5.65	1.23	2.36	1.795	This study
EWEST 911	40.0084	-78.3803	197	Dhl	BPV	Calcite	GG	N.A.	N.A.	N.A.	N.A.	129 - 138	9	U	3.33	138	123	153	4.7	5.9	1.4	2.6	2	This study
NEEDM 811	39.7545	-78.1795	209	Dhl	WNW	Calcite	GG	N.A.	N.A.	N.A.	N.A.	135	3	U	3.83	135	119.6	149.5	4.6	5.75	0.77	1.92	1.345	This study
RAINS 341	39.9992	-78.5047	195	Dhl	NW	Calcite	GG	N.A.	N.A.	N.A.	N.A.	104.5 - 113.1	4	U	3.29	113.1	96.824	121.03	3.724	4.655	0.434	1.365	0.8995	This study
RAINS 343	39.9992	-78.5047	195	Dhl	NW	Calcite	GG	N.A.	N.A.	N.A.	N.A.	138	3	U	3.29	138	122.72	153.4	4.72	5.9	1.43	2.61	2.02	This study
BIGCT 331 Cove Fault	39.8663	-78.0359	214	St	N.D.	Quartz	GG	N.A.	N.A.	N.A.	N.A.	183 to 212	15	P	3.53	212	199.68	249.6	7.68	9.6	4.15	6.07	5.11	O'Kane (2005)
MERCR 23F	39.8693	-77.9566	215	St	NNE	Quartz	GG	N.A.	N.A.	N.A.	N.A.	173.6	6	P	4.79	173.6	159.744	199.68	6.144	7.68	1.354	2.89	2.122	This study
BUFMI 423	39.939	-78.6375	194	Oj	FV	Quartz	MI	-98.8	8	P	0	N.A.	N.A.	N.A.	4.47	-98.8	84	97	3.23077	3.73077	-1.23923	-0.739231	-0.989231	This study
EWEST 9101	40.011	-78.3996	196	Oj	FV	Quartz	GG	N.A.	N.A.	N.A.	N.A.	199.0 - 202.0	2	U	4.73	202	189.28	236.6	7.28	9.1	2.55	4.37	3.46	This study
Cross Section 12
BELGV 312 WP 18	39.7199	-78.2843	229	Mp	N.D.	Quartz	MI	-107.5	68	U	2	N.A.	N.A.	N.A.	0.6	-107.5	139	166	5.3	6.4	4.7	5.8	5.25	Lacek (2015)
BELGV 313 WP-05-1	39.6909	-78.2987	228	Mp	N.D.	Quartz	MI	-116.8	21	U	2	N.A.	N.A.	N.A.	0.6	-116.8	181	224	6.26923	7.65385	5.7	7.1	6.4	Lacek (2015)
BELGV 521	39.6892	-78.3001	364	Mp	ENE	Quartz	GG	N.A.	N.A.	N.A.	N.A.	193.5	8	PS	0.57	193.5	180.44	225.55	6.94	8.675	6.37	8.105	7.2375	This study
BIGPL 111 SITE 5	39.6225	-78.0911	233	Mp	N.D.	Quartz	MI	-117	21	U	2	N.A.	N.A.	N.A.	0.61	-117	188	232	7	8.9	6.4	8.3	7.3	Castles (2010)
STCRO 911 SITE 15	39.5036	-78.1427	235	Mp	N.D.	Quartz	MI	-103	21	U	2	N.A.	N.A.	N.A.	0.61	-103	118	140	4.5	5.4	3.9	4.8	4.3
STCRO 921 SITE 20	39.504	-78.1503	234	Mp	N.D.	Quartz	MI	-107	22	U	2	N.A.	N.A.	N.A.	0.61	-107	138	163	5.3	6.3	4.7	5.7	5.2
AMARA 511	39.7951	-78.3129	229	Dck	NNW	Quartz	GG	N.A.	N.A.	N.A.	N.A.	155.1	5	P	0.85	155.1	140.504	175.63	5.404	6.755	4.554	5.905	5.2295	This study
AMARA 512	39.7951	-78.3129	229	Dck	FV	Quartz	GG	N.A.	N.A.	N.A.	N.A.	145.8	4	PS	0.85	145.8	131	164	5	6.3	4.2	5.4	4.8	This study
ARTEM 612	39.8089	-78.3372	224	Dck	NNW	Quartz	GG	N.A.	N.A.	N.A.	N.A.	132.7	3	PS	2.17	132.7	117.208	146.51	4.508	5.635	2.338	3.465	2.9015	This study
ARTEM 614	39.8089	-78.3372	224	Dck	NNE	Quartz	GG	N.A.	N.A.	N.A.	N.A.	136.8	5	P	2.17	136.8	121.472	151.84	4.672	5.84	2.502	3.67	3.086	This study
CHANY 531	39.8212	-78.449	222	Dck	NW	Quartz	GG	N.A.	N.A.	N.A.	N.A.	150.2	7	U	1.29	150.2	135.408	169.26	5.208	6.51	3.918	5.22	4.569	This study
CHRRY 713	39.6432	-78.0953	232	Dck	WNW	Quartz	GG	N.A.	N.A.	N.A.	N.A.	107.5	5	P	2	107.5	91	113.75	3.5	4.375	1.5	2.375	1.9375	This study
PAWPA 812	39.5225	-78.4447	227	Dck	ENE	Quartz	GG	N.A.	N.A.	N.A.	N.A.	121.2 - 128.0	4	U	1.19	128	112.32	140.4	4.32	5.4	3.13	4.21	3.67	Evans (2010)
PAWPA 813	39.5225	-78.4447	227	Dck	NE	Quartz	GG	N.A.	N.A.	N.A.	N.A.	121.2	3	PS	1.19	121.2	105.248	131.56	4.048	5.06	2.858	3.87	3.364	Evans (2010)
ARTEM 921	39.6343	-78.3834	226	Dch	NNE	Quartz	GG	N.A.	N.A.	N.A.	N.A.	132.0 - 132.5	4	P	1.97	132.5	117	146.25	4.5	5.625	2.53	3.655	3.0925	This study
ARTEM 922	39.6343	-78.3834	226	Dch	NW	Quartz	GG	N.A.	N.A.	N.A.	N.A.	145.5 - 147.1	2	P	1.97	147.1	132.184	165.23	5.084	6.355	3.114	4.385	3.7495	This study
ARTEM 931	39.6585	-78.3949	225	Dch	NW	Quartz	GG	N.A.	N.A.	N.A.	N.A.	133	3	P	0.97	133	117.52	146.9	4.52	5.65	3.55	4.68	4.115	This study
BIGPL 611	39.5664	-78.0935	236	Dch	NNE	Quartz	GG	N.A.	N.A.	N.A.	N.A.	111.5	7	P	1.52	111.5	95.16	118.95	3.66	4.575	2.14	3.055	2.5975	This study
CHANY 511	39.8212	-78.4248	223	Dch	BPV	Quartz	GG	N.A.	N.A.	N.A.	N.A.	168.2 - 206.0	4	U	1.64	206	193.44	241.8	7.44	9.3	5.8	7.66	6.73	This study
CHRRY 623	39.6751	-78.0972	231	Dch	NNE	Quartz	GG	N.A.	N.A.	N.A.	N.A.	128	3	P	2	128	112.32	140.4	4.32	5.4	2.32	3.4	2.86	This study
CUMBR 512	39.677	-78.8053	367	Dch	NE	Quartz	GG	89.3 (LHI)	6	P	N.A.	N.A.	N.A.	N.A.	2.16	89.3	72.072	90.09	2.772	3.465	0.612	1.305	0.9585	Evans (2010)
FLINT 832	39.6418	-78.562	221	Dch	NE	Quartz	GG	N.A.	N.A.	N.A.	N.A.	122	8	P	1.7	122	106.08	132.6	4.08	5.1	2.38	3.4	2.89	This study
LRGNT 312	39.4833	-78.3909	365	Dch	NE	Quartz	GG	N.A.	N.A.	N.A.	N.A.	96.9 - 98.6	4	P	2.09	98.6	81.744	102.18	3.144	3.93	1.054	1.84	1.447	Evans (2010)
CUMBR 812	39.6375	-78.8342	217	Db and Dtr	NNE	Quartz	GG	N.A.	N.A.	N.A.		74.4 - 89.3	4	U	1.76	89.3	72	90	2.8	3.5	1	1.7	1.4	Evans (2010)
BIGPL 411	39.5547	-78.0099	237	Dm and Dmt	NNE	Quartz	MI	-124.4	8	P	0	N.A.	N.A.	N.A.	3.72	-124.4	247	N.D.	9.5	N.D.	5.78	5.8	N.D.	This study
CHANY 611	39.8236	-78.4913	220	Dm and Dmt	NW	Quartz	GG	N.A.	N.A.	N.A.	N.A.	205	5	PS	2.89	205	192.4	240.5	7.4	9.25	4.51	6.36	5.435	This study
HEDGE 611	39.5584	-77.9991	366	Dm and Dmt	WNW	Quartz	GG	N.A.	N.A.	N.A.	N.A.	196.4	5	P	2.96	196.4	183.456	229.32	7.056	8.82	4.096	5.86	4.978	This study
HYNDM 611	39.8302	-78.7195	218	Dm and Dmt	NW	Quartz	MI	-100.8	7	U	0	N.A.	N.A.	N.A.	3.01	-100.8	99	114	3.80769	4.38462	0.79	1.39	1.09	This study
WITTN 71YODER Core 5635.5	39.7756	-78.9727	378	Dm and Dmt	N.D.	Calcite	MI	-95.8	5	P	0	N.A.	N.A.	N.A.	2.81	-95.8	84	96	3.23077	3.69231	0.39	0.89	0.64	Evans et al. (2014)
WITTN 71YODER Core 5689.8	39.7756	-78.9727	378	Dm and Dmt	N.D.	Barite	MI	-99.1	6	P	0	N.A.	N.A.	N.A.	2.81	-99.1	90	103	3.46154	3.96154	0.69	1.19	0.94	Evans et al. (2014)
HANCK 821	39.641	-78.2319	230	Scl	NNE	Quartz	GG	N.A.	N.A.	N.A.	N.A.	165.1	3	P	4.35	165.1	150.904	188.63	5.804	7.255	1.454	2.905	2.1795	This study
HYNDM 212	39.8747	-78.6723	219	St	EW	Quartz	GG	N.A.	N.A.	N.A.	N.A.	168	8	P	4.11	168	153.92	192.4	5.92	7.4	1.81	3.29	2.55	This study
Cross Section 13
AGSTA 512	39.3258	-78.6944	255	Dck	NE	Quartz	GG	N.A.	N.A.	N.A.	N.A.	102.5	3	P	0.78	102.5	85.8	107.25	3.3	4.125	2.52	3.345	2.9325	Evans (2010)
AGSTA 611	39.3242	-78.7228	254	Dck	NW	Quartz	GG	N.A.	N.A.	N.A.	N.A.	96.5 to 102.0	4	P	1.38	102	85.28	106.6	3.28	4.1	1.9	2.72	2.31	Evans (2010)
AGSTA 612	39.3242	-78.7228	254	Dck	BPV	Quartz	GG	N.A.	N.A.	N.A.	N.A.	98.2 to 112.6	8	P	1.38	112.6	96.304	120.38	3.704	4.63	2.324	3.25	2.787	Evans (2010)
LRGNT 221	39.4742	-78.4342	258	Dck	BPV	Quartz	GG	N.A.	N.A.	N.A.	N.A.	120	3	P	1.05	120	104	130	4	5	2.95	3.95	3.45	Evans (2010)
HROCK 311	39.3517	-78.5081	259	Dch	NE	Quartz	GG	N.A.	N.A.	N.A.	N.A.	90.6 to 96.5	7	U	2.63	96.5	79.56	99.45	3.06	3.825	0.43	1.195	0.8125	Evans (2010)
KEYSR 61A1	39.45	-78.9731	241	Dch	FV	Quartz	GG	N.A.	N.A.	N.A.	N.A.	91.9	8	P	1.93	91.9	74.776	93.47	2.876	3.595	0.946	1.665	1.3055	Evans (2010)
LEVEL 611	39.4236	-78.5846	256	Dch	NE	Quartz	GG	N.A.	N.A.	N.A.	N.A.	180.8 to 188.1	3	P	1.86	188.1	174.824	218.53	6.724	8.405	4.864	6.545	5.7045	Evans (2010)
LEVEL 613	39.4236	-78.5846	256	Dch	NE	Quartz	GG	N.A.	N.A.	N.A.	N.A.	127.9 to 134.4	3	P	1.86	134.4	118.976	148.72	4.576	5.72	2.716	3.86	3.288	Evans (2010)
LEVEL 811	39.4094	-78.56	257	Dch	NW	Quartz	GG	N.A.	N.A.	N.A.	N.A.	125.1 to 126.1	4	U	1.76	126.1	110.344	137.93	4.244	5.305	2.484	3.545	3.0145	Evans (2010)
SPRNG 112	39.4664	-78.7091	249	Dch	NE	Quartz	GG	N.A.	N.A.	N.A.	N.A.	180.1 - 180.2	4	U	1.24	180.2	166.608	208.26	6.408	8.01	5.168	6.77	5.969	Evans (2010)
SPRNG 122	39.4764	-78.7347	248	Dch	NE	Quartz	GG	N.A.	N.A.	N.A.	N.A.	125.6	1	U	2.25	125.6	109.824	137.28	4.224	5.28	1.974	3.03	2.502	Evans (2010)
WESTP 371	39.4626	-79.0266	238	Dch	NE	Quartz	GG	N.A.	N.A.	N.A.	N.A.	111.2	3	P	1.33	111.2	94.848	118.56	3.648	4.56	2.318	3.23	2.774	Evans (2010)
WESTP 411	39.4375	-79.0028	239	Dch	FV	Quartz	MI	-96.7	11	P	0	N.A.	N.A.	N.A.	1.42	-96.7	81	90	3.1	3.5	1.68	2.08	1.88	Evans (2010)
WINCH 661	39.1994	-78.2494	270	Dch	ENE	Quartz	MI	-107.8	6	P	0	N.A.	N.A.	N.A.	2.8	-107.8	134	162	5.2	6.2	2.4	3.4	2.9	Evans (2010)
WINCH 664	39.1994	-78.2494	270	Dch	ENE	Quartz	MI	-101.2	5	P	0	N.A.	N.A.	N.A.	2.8	-101.2	100	117	3.8	4.5	1	1.7	1.35	Evans (2010)
GORE 721	39.2672	-78.3381	266	Db and Dtr	ENE	Quartz	GG	N.A.	N.A.	N.A.	N.A.	115.9 to 122.9	4	P	3.24	122.9	107.016	133.77	4.116	5.145	0.876	1.905	1.3905	Evans (2010)
KEYSR 23A	39.4694	-78.9583	240	Db and Dtr	NW	Quartz	MI	-92.6	5	P	0	N.A.	N.A.	N.A.	1.91	-92.6	63	71	2.4	2.7	0.49	0.79	0.64	Evans (2010)
CPNBR 521	39.3019	-78.4431	264	Dm and Dmt	BPV	Quartz	II	-123.1	15	P	4	190.1 - 208.8	9	P	3.86	-123.1	232§§§	N.D.	8.9§§§	N.D.	5.0§§§	N.D.	N.D.	Evans (2010)
CPNBR 523	39.3019	-78.4431	264	Dm and Dmt	BPV	Quartz	MI	-117.1	11	P,U	4	N.A.	N.A.	N.A.	3.86	-117.1	186	231	7.15385	8.88462	3.34	5.04	4.19	Evans (2010)
GORE 711	39.2619	-78.3303	265	Dm and Dmt	NE	Quartz	GG	N.A.	N.A.	N.A.	2	212.3 to 218.5	3	P	3.81	218.5	206.44	258.05	7.94	9.925	4.13	6.115	5.1225	Evans (2010)
GORE 712	39.2619	-78.3303	265	Dm and Dmt	ENE	Quartz	GG	N.A.	N.A.	N.A.	2	215.0 to 218.9	5	P	3.81	218.9	206.856	258.57	7.956	9.945	4.146	6.135	5.1405	Evans (2010)
GORE 731	39.2544	-78.3356	267	Dm and Dmt	BPV	Quartz	GG	N.A.	N.A.	N.A.	N.A.	172.9 to 182.4	3	P	3.87	182.4	168.896	211.12	6.496	8.12	2.626	4.25	3.438	Evans (2010)
HAYFD 517	39.1867	-78.33	269	Dm and Dmt	FV	Quartz	MI	-136	9	P	0	N.A.	N.A.	N.A.	3.87	-136	358	N.D.	13.8	N.D.	N.D.	9.93	N.D.	Evans (2010)
HEADS 313	39.4981	-78.7631	247	Dm and Dmt	ENE	Quartz	GG	N.A.	N.A.	N.A.	N.A.	200.3	2	U	2.93	200.3	187.512	234.39	7.212	9.015	4.282	6.085	5.1835	Evans (2010)
HROCK 321	39.3381	-78.5069	260	Dm and Dmt	NE	Quartz	MI	-108.1	11	P	0	N.A.	N.A.	N.A.	3.32	-108.1	186	214	7.2	8.2	3.88	4.88	4.38	Evans (2010)
KEYSR 626	39.45	-78.9736	242	Dm and Dmt	BPV	Quartz	MI	-90.6	5	U	2	N.A.	N.A.	N.A.	2.75	-90.6	55	61	2.1	2.3	-0.65	-0.45	-0.55	Evans (2010)
SPRNG 511	39.4472	-78.6889	253	Dm and Dmt	FV	Quartz	MI	-113.5	9	U		N.A.	N.A.	N.A.	1.26	-113.5	164	199	6.30769	7.65385	5.04	6.44	5.74	Evans (2010)
SPRNG 711	39.3947	-78.7353	251	Dm and Dmt	BPV	Quartz	GG	N.A.	N.A.	N.A.	N.A.	189.8	2	U	3.25	189.8	176.592	220.74	6.792	8.49	3.542	5.24	4.391	Evans (2010)
SPRNG 712	39.3947	-78.7353	251	Dm and Dmt	NNW	Quartz	MI	-102.5	14	U	0	N.A.	N.A.	N.A.	3.25	-102.5	105	123	4	4.7	0.75	1.45	1.1	Evans (2010)
SPRNG 771	39.3903	-78.7361	252	Dm and Dmt	FV	Quartz	MI	-105.7	11	P	0	N.A.	N.A.	N.A.	3.25	-105.7	122	145	4.7	5.6	1.45	2.35	1.9	Evans (2010)
SPRNG 772	39.3903	-78.7361	252	Dm and Dmt	BPV	Quartz	GG	N.A.	N.A.	N.A.	N.A.	182.5 to 188.3	3	P	3.25	188.3	175.032	218.79	6.732	8.415	3.482	5.165	4.3235	Evans (2010)
KEYSR 212	39.4697	-78.9408	243	Dor	NW	Calcite	GG	N.A.	N.A.	N.A.	N.A.	119.3 TO 120.2	3	P	2.94	120.2	104.208	130.26	4.008	5.01	1.068	2.07	1.569	Evans (2010)
SPRNG 721	39.3967	-78.7375	250	Dor	NE	Quartz	MI	-108.4	9	P	0	N.A.	N.A.	N.A.	3.35	-108.4	137	164	5.3	6.3	1.95	2.95	2.45	Evans (2010)
CRSPT 512	39.5469	-78.8178	246	Dhl	NNW	Quartz	MI	-104.2	6	U	0	N.A.	N.A.	N.A.	3.24	-104.2	112	129	4.30769	4.96154	1.06	1.76	1.41	This study
HAYFD 211	39.2444	-78.2981	268	Dhl	BPV	Calcite	GG	N.A.	N.A.	N.A.	N.A.	92.1 to 106.5	6	P	4.08	106.5	89.96	112.45	3.46	4.325	-0.62	0.245	-0.1875	Evans (2010)
HAYFD 212	39.2444	-78.2981	268	Dhl	NE	Calcite	GG	N.A.	N.A.	N.A.	N.A.	101.0 to 102.2	13	P	4.08	102.2	85.488	106.86	3.288	4.11	-0.792	0.03	-0.381	Evans (2010)
HROCK 822	39.2619	-78.5397	261	Dhl	NW	Calcite	GG	N.A.	N.A.	N.A.	N.A.	97.4 to 97.5	3	P	4.17	97.5	80.6	100.75	3.1	3.875	-1.07	-0.295	-0.6825	Evans (2010)
LRGNT 914	39.4028	-78.3833	262	Dhl	BPV	Quartz	MI	-130.6	7	P	0	N.A.	N.A.	N.A.	4.08	-130.6	N.D.	300	N.D.	11.5	N.D.	7.42	N.D.	Evans (2010)
CRSPT 611	39.575	-78.8403	244	Sto	FV	Quartz	GG	N.A.	N.A.	N.A.	N.A.	96.6	3	U	3.34	96.6	79.664	99.58	3.064	3.83	-0.276	0.49	0.107	This study
CRSPT 612	39.575	-78.8403	244	Sto	WNW	Quartz	MI	-121.4	13	U	0	N.A.	N.A.	N.A.	3.34	-121.4	N.D.	218	N.D.	8.4	N.D.	4.3	N.D.	This study
CRSPT 616	39.575	-78.8403	244	Sto	NE	Quartz	GG	N.A.	N.A.	N.A.	N.A.	145.5 - 156.5	4	U	3.34	156.5	141.96	177.45	5.46	6.825	2.12	3.485	2.8025	This study
KEYSR 513	39.4278	-78.9631	245	Sto	NE	Quartz	GG	N.A.	N.A.	N.A.	N.A.	75.1 to 76.8	4	P	3.49	76.8	59.072	73.84	2.272	2.84	-1.218	-0.65	-0.934	Evans (2010)
CPNBR 212	39.3375	-78.4383	263	Scl	NNE	Quartz	GG	N.A.	N.A.	N.A.	N.A.	119.0 to 120.3	5	P	4.26	120.3	104.312	130.39	4.012	5.015	-0.248	0.755	0.2535	Evans (2010)
WINCH 651	39.195	-78.2372	271	Om	FV	Quartz	MI	-127.6	10	P	0	N.A.	N.A.	N.A.	6	-127.6	275	N.D.	8.9	N.D.	2.9	N.D.	N.D.	Evans (2010)
Cross Section 14
SECTR 911	39.1361	-78.7753	289	Dck	EW	Quartz	GG	N.A.	N.A.	N.A.	N.A.	105.6 to 106.1	2	P	1.62	106.1	89.544	111.93	3.444	4.305	1.824	2.685	2.2545	Evans (2010)
SECTR 921	39.1383	-78.7706	290	Dck	NE	Quartz	GG	N.A.	N.A.	N.A.	N.A.	98.8 to 107.3	4	P	1.62	107.3	90.792	113.49	3.492	4.365	1.872	2.745	2.3085	Evans (2010)
ANTIO 121	39.3339	-79.0894	272	Dch	NE	Quartz	GG	N.A.	N.A.	N.A.	N.A.	122.5 to 122.7	2	P	2.37	122.7	106.808	133.51	4.108	5.135	1.738	2.765	2.2515	Evans (2010)
BURLG 122	39.3371	-78.9695	277	Dch	NE	Quartz	II	-117.8	14	P	0	181.9 to 184.8	4	P	1.99	-117.8	193§§§	N.D.	7.4§§§	N.D.	5.4§§§	N.D.	N.D.	Evans (2010)
BURLG 123	39.3371	-78.9695	277	Dch	BPV	Quartz	GG	N.A.	N.A.	N.A.	N.A.	172.8 to 179.6	3	P	1.99	179.6	165.984	207.48	6.384	7.98	4.394	5.99	5.192	Evans (2010)
YLWSP 911	39.1517	-78.5217	297	Dch	NE	Quartz	GG	N.A.	N.A.	N.A.	N.A.	100.3 to 108.0	4	P	3.62	108	91.52	114.4	3.52	4.4	-0.1	0.78	0.34	Evans (2010)
BURLG 131	39.3406	-78.9445	278	Db and Dtr	NE	Quartz	GG	N.A.	N.A.	N.A.	N.A.	182.5 to 189.4	4	P	2.19	189.4	169	220.22	6.776	8.47	4.586	6.28	5.433	Evans (2010)
MEDLY 514	39.1972	-79.0461	279	Db and Dtr	NW	Calcite	MI	-96.8	3	P	0	N.A.	N.A.	N.A.	2.93	-96.8	82	93	3.2	3.6	0.27	0.67	0.47	Evans (2010)
MEDLY 515	39.1972	-79.0461	279	Db and Dtr	N.D.	Calcite	MI	-100.3	15	P	0	N.A.	N.A.	N.A.	2.93	-100.3	100	115	3.8	4.4	0.87	1.47	1.17	Evans (2010)
RIO 911	39.1419	-78.6606	291	Db and Dtr	NE	Quartz	GG	N.A.	N.A.	N.A.	N.A.	175.4 to 178.3	10	P	3.31	178.3	164.632	205.79	6.332	7.915	3.022	4.605	3.8135	Evans (2010)
RIO 913	39.1419	-78.6606	291	Db and Dtr	BPV	Quartz	GG	N.A.	N.A.	N.A.	N.A.	190.5 to 196.5	5	P	3.31	196.5	183.56	229.45	7.06	8.825	3.75	5.515	4.6325	Evans (2010)
ANTIO 811	39.2694	-79.0653	276	Dm and Dmt	FV	Quartz	MI	-92.8	15	P	2	N.A.	N.A.	N.A.	2.93	-92.8	62	70	2.4	2.7	-0.53	-0.23	-0.38	Evans (2010)
MFALS 531	39.0897	-78.4333	298	Dm and Dmt	FV	Quartz	II	-126.9	13	P	0	N.A.	N.A.	N.A.	3.98	-126.9	273§§§	N.D.	10.5§§§	N.D.	6.5§§§	N.D.	N.D.	Evans (2010)
ANTIO 322	39.3689	-79.0306	273	Dor	NE	Quartz	GG	N.A.	N.A.	N.A.	N.A.	158	3	PS	2.98	158	143.52	179.4	5.52	6.9	2.54	3.92	3.23	Evans (2010)
MEDLY 4161B	39.2016	-79.0281	280	Dor	N.D.	Quartz	MI	-92.5	10	P	0	N.A.	N.A.	N.A.	3.45	-92.5	62	71	2.4	2.7	-1.05	-0.75	-0.9	Evans (2010)
YLWSP 312	39.2308	-78.5186	295	Dor	NE	Quartz	GG	N.A.	N.A.	N.A.	N.A.	202.6 to 211.6	2	P	4.02	211.8	199.472	249.34	7.672	9.59	3.652	5.57	4.611	Evans (2010)
YLWSP 313	39.2308	-78.5186	295	Dor	FV	Quartz	GG	N.A.	N.A.	N.A.	N.A.	202.9	3	PS	4.02	202.9	190.216	237.77	7.316	9.145	3.296	5.125	4.2105	Evans (2010)
BAKER 611	39.0564	-78.7233	292	Dhl	NW	Quartz	GG	N.A.	N.A.	N.A.	N.A.	94.9 to 107.3	5	P	4.26	107.3	90.792	113.49	3.492	4.365	-0.768	0.105	-0.3315	Evans (2010)
BAKER 612	39.0564	-78.7233	292	Dhl	BPV	Calcite	GG	N.A.	N.A.	N.A.	N.A.	70.0 to 82.0	2	P	4.26	82	64.48	80.6	2.48	3.1	-1.78	-1.16	-1.47	Evans (2010)
BAKER 615	39.0564	-78.7233	292	Dhl	FV	Quartz	GG	N.A.	N.A.	N.A.	N.A.	137	3	PS	4.26	137	121.68	152.1	4.68	5.85	0.42	1.59	1.005	Evans (2010)
MEDLY 413	39.1844	-79.0014	285	Dhl	NW	Quartz	GG	N.A.	N.A.	N.A.	N.A.	167.5 to 170.0	9	P	3.43	170	156	195	6	7.5	2.57	4.07	3.32	Evans et al. (2012)
MEDLY 4141	39.1844	-79.0014	286	Dhl	NW	Calcite	MI	-97.4	3	P	0	N.A.	N.A.	N.A.	3.43	-97.4	83	95	3.2	3.7	-0.23	0.27	0.02	Evans et al. (2012)
MEDLY 4143	39.1844	-79.0014	286	Dhl	NE	Calcite	MI	-97.4	10	P	0	139	3	P	3.43	139	123.76	154.7	4.76	5.95	1.33	2.52	1.925	Evans et al. (2012)
ANTIO 312	39.3637	-79.0268	274	Sto	NE	Quartz	GG	N.A.	N.A.	N.A.	N.A.	128.6 to 139.1	4	P	3.26	139.1	123.864	154.83	4.764	5.955	1.504	2.695	2.0995	Evans (2010)
ANTIO 314	39.3637	-79.0268	274	Sto	NE	Quartz	GG	N.A.	N.A.	N.A.	N.A.	126	2	P	3.26	126	110.24	137.8	4.24	5.3	0.98	2.04	1.51	Evans (2010)
MEDLY 422	39.1999	-79.0192	281	Sto	ENE	Calcite	GG	N.A.	N.A.	N.A.	N.A.	95.0 to 95.2	4	P	3.63	95.2	78.208	97.76	3.008	3.76	-0.622	0.13	-0.246	Evans et al. (2012)
MEDLY 441B	39.2	-79.0192	287	Sto	NW	Calcite	MI	-105.9	17	P	0	N.A.	N.A.	N.A.	3.63	-105.9	125	147	4.8	5.7	1.17	2.07	1.62	Evans et al. (2012)
MEDLY 471	39.19	-79.0044	284	Sto	N.D.	Quartz	MI	-111.2	4	P	0	N.A.	N.A.	N.A.	3.53	-111.2	154	188	5.9	7.2	2.37	3.67	3.02	Evans et al. (2012)
MEDLY 4103	39.1988	-79.0169	282	Swc and Smc	NE	Quartz	GG	N.A.	N.A.	N.A.	N.A.	135.5 to 138.0	3	P	3.78	138	122.72	153.4	4.72	5.9	0.94	2.12	1.53	Evans et al. (2012)
MEDLY 4111	39.1948	-79.0124	283	Swc and Smc	N.D.	Quartz	GG	N.A.	N.A.	N.A.	N.A.	128.6	6	PS	3.73	128.6	112.944	141.18	4.344	5.43	0.614	1.7	1.157	Evans et al. (2012)
SECTR 132	39.2428	-78.8647	288	Swc and Smc	NE	Quartz	GG	N.A.	N.A.	N.A.	N.A.	114.7 to 122.2	3	P	4.27	135	119.6	149.5	4.6	5.75	0.33	1.48	0.905	Evans (2010)
YLWSP 212	39.215	-78.5533	293	Swc and Smc	BPV	Quartz	GG	N.A.	N.A.	N.A.	N.A.	100.1 to 106.4	8	P	4.23	106.4	89.856	112.32	3.456	4.32	-0.774	0.09	-0.342	Evans (2010)
BAKER 511	39.0619	-78.6783	294	Scl	NE	Quartz	GG	N.A.	N.A.	N.A.	N.A.	111.2 to 118.0	4	P	4.32	118	101.92	127.4	3.92	4.9	-0.4	0.58	0.09	Evans (2010)
ANTIO 351	39.3642	-79.0294	275	St	NE	Quartz	GG	N.A.	N.A.	N.A.	N.A.	148.1 to 165.2	9	P	3.96	165.2	151.008	188.76	5.808	7.26	1.848	3.3	2.574	Evans (2010)
WLFGP 211	38.9803	-78.6681	296	Om	BPV	Quartz	II	-119.2	13	P	0	193.9 - 196.6	2	P	5.69	-119.2	221§§§	N.D.	8.5§§§	N.D.	2.8§§§	N.D.	N.D.	Evans (2010)
WLFGP 212	38.9803	-78.6681	296	Om	BPV	Quartz	MI	-121.4	16	P	2	N.A.	N.A.	N.A.	5.69	-121.4	218	280	8.4	10.8	2.71	5.11	3.91	Evans (2010)
Cross Section 15
MAYSV 311	39.0883	-79.1319	302	Db and Dtr	NE	Quartz	MI	-109.3	16	P,U	0	N.A.	N.A.	N.A.	2.33	-109.3	142	169	5.5	6.5	3.17	4.17	3.67	Evans (2010)
HOPEV 531	38.955	-79.2967	299	Dm and Dmt	FV	Quartz	MI	-98.2	7	P	0	N.A.	N.A.	N.A.	2.86	-98.2	87	100	3.3	3.8	0.44	0.94	0.69	Evans (2010)
LSTCY 722	38.8756	-78.85	315	Dm and Dmt	NW	Calcite	MI	-111.2	4	PS	0	N.A.	N.A.	N.A.	4	-111.2	153	185	5.9	7.1	1.9	3.1	2.5	Evans (2010)
LSTCY 723	38.8756	-78.85	315	Dm and Dmt	BPV	Quartz	MI	-120.3	18	P	0	N.A.	N.A.	N.A.	4	-120.3	212	261	8.2	10	4.2	6	5.1	Evans (2010)
MAYSV 231/233	39.1131	-79.1651	301	Dm and Dmt	FV	Quartz	GG	N.A.	N.A.	N.A.	N.A.	185.7	1	P	3.25	187.7	174.408	218.01	6.708	8.385	3.458	5.135	4.2965	Evans (2010)
MAYSV 232	39.1131	-79.1651	301	Dm and Dmt	BPV	Quartz	GG	N.A.	N.A.	N.A.	N.A.	173.4	1		2.85	173.4	159.536	199.42	6.136	7.67	3.286	4.82	4.053	Evans (2010)
MAYSV 911	39.0036	-79.1572	303	Dm and Dmt	NW	Quartz	MI	-107.8	8	U	4	N.A.	N.A.	N.A.	3.07	-107.8	134	162	5.2	6.2	2.13	3.13	2.63	Evans (2010)
MAYSV 912	39.0036	-79.1572	303	Dm and Dmt	FV	Quartz	MI	-97.2	4	U	4	N.A.	N.A.	N.A.	3.07	-97.2	83	93	3.2	3.6	0.13	0.53	0.33	Evans (2010)
MOORE 811	39.0269	-78.9425	314	Dm and Dmt	BPV	Quartz	GG	N.A.	N.A.	N.A.	N.A.	204.5 to 215.0	5	p	3.15	215	202.8	253.5	7.8	9.75	4.65	6.6	5.625	Evans (2010)
PWEST 311	38.9778	-79.1261	308	Dm and Dmt	BPV	Calcite	GG	N.A.	N.A.	N.A.	N.A.	111.7 to 114.0	4	PS	3.18	114	97.76	122.2	3.76	4.7	0.58	1.52	1.05	Evans (2010)
PWEST 314	38.9778	-79.1261	308	Dm and Dmt	N.D.	Quartz	MI	-99	5	PS	0	N.A.	N.A.	N.A.	3.18	-99	89	103	3.4	4	0.22	0.82	0.52	Evans (2010)
PWEST 315	38.9778	-79.1261	308	Dm and Dmt	NW	Quartz	GG	N.A.	N.A.	N.A.	N.A.	182.0 to 186.0	3	U	3.18	186	172.64	215.8	6.64	8.3	3.46	5.12	4.29	Evans (2010)
PWEST 317	38.9778	-79.1261	308	Dm and Dmt	FV	Quartz	GG	N.A.	N.A.	N.A.	N.A.	169.4 to 184.5	6	P	3.18	184.5	171.08	213.85	6.58	8.225	3.4	5.045	4.2225	Evans (2010)
RIG 412	39.2131	-78.6664	312	Dm and Dmt	NE	Calcite	MI	-103.6	3	PS	0	N.A.	N.A.	N.A.	3.15	-103.6	109	129	4.2	5	1.05	1.85	1.45	Evans (2010)
RIG 421	39.062	-79.0254	313	Dm and Dmt	NE	Quartz	MI	-115.1	7	P	0	N.A.	N.A.	N.A.	3.05	-115.1	175	214	6.7	8.2	3.65	5.15	4.4	Evans (2010)
RIG 252	39.0938	-79.0773	304	Dor	NE	Calcite	MI	-98.6	5	PS	0			N.A.	3.28	-98.6	92	106	3.5	4.1	0.22	0.82	0.52	Evans (2010)
RIG 821	39.0036	-79.0795	311	Dor	FV	Quartz	MI	-99.1	5	PS	0	N.A.	N.A.	N.A.	3.36	-99.1	89	103	3.4	4	0.04	0.64	0.34	Evans (2010)
LSTCY 513	38.9519	-78.7933	316	Dhl	ENE	Quartz	MI	-117.7	16	P	0	N.A.	N.A.	N.A.	4.33	-117.7	189	236	7.3	9.1	2.97	4.77	3.87	Evans (2010)
LSTCY 515	38.9519	-78.7933	316	Dhl	ENE	Calcite	GG	N.A.	N.A.	N.A.	N.A.	111.0 to 120.0	2	P	4.33	120	104	130	4	5	-0.33	0.67	0.17	Evans (2010)
LSTCY 516	38.9519	-78.7933	316	Dhl	NW	Quartz	GG	N.A.	N.A.	N.A.	N.A.	156.9	4	PS	4.33	156.9	142.376	177.97	5.476	6.845	1.146	2.515	1.8305	Evans (2010)
PEAST 111	38.9994	-79.095	309	Dhl	BPV	Quartz	MI	-100.2	4	P	2	N.A.	N.A.	N.A.	3.46	-100.2	95	110	3.7	4.2	0.24	0.74	0.49	Evans (2010)
PEAST 113	38.9994	-79.095	309	Dhl	EW	Calcite	GG	N.A.	N.A.	N.A.	N.A.	85.0 to 91.0	4	P	3.46	91	73.84	92.3	2.84	3.55	-0.62	0.09	-0.265	Evans (2010)
RIG 812	39.0036	-79.0806	310	Dhl	N.D.	Quartz	MI	-105.5	11	P	0	N.A.	N.A.	N.A.	3.46	-105.5	121	143	4.7	5.5	1.24	2.04	1.64	Evans et al. (2012)
RIG 813	39.0036	-79.0806	310	Dhl	FV	Calcite	MI	-99.8	16	P	0	N.A.	N.A.	N.A.	3.46	-99.8	93	107	3.6	4.1	0.14	0.64	0.39	Evans et al. (2012)
RIG 221	39.0936	-79.0708	305	Sto	NE	Calcite	GG	N.A.	N.A.	N.A.	N.A.	104	5	P	3.58	104	87.36	109.2	3.36	4.2	-0.22	0.62	0.2	Evans et al. (2012)
RIG 222A	39.0936	-79.0708	305	Sto	NE	Calcite	GG	N.A.	N.A.	N.A.	N.A.	105.5	6	P	3.58	105.5	88.92	111.15	3.42	4.275	-0.16	0.695	0.2675	Evans et al. (2012)
RIG 231	39.0939	-79.0539	307	Sto	NNW	Calcite	GG	N.A.	N.A.	N.A.	N.A.	102.5 to 105.0	4	P	3.78	105	88.4	110.5	3.4	4.25	-0.38	0.47	0.045	Evans et al. (2012)
RIG 232	39.0939	-79.0539	307	Sto	EW	Calcite	GG	N.A.	N.A.	N.A.	N.A.	78.1 to 79.0	3	p	3.78	79	61.36	76.7	2.36	2.95	-1.42	-0.83	-1.125	Evans et al. (2012)
RIG 235	39.0939	-79.0539	307	Sto	NE	Calcite	GG	N.A.	N.A.	N.A.	N.A.	97.6 to 105.0	3	P	3.78	105	88.4	110.5	3.4	4.25	-0.38	0.47	0.045	Evans et al. (2012)
RIG 271	39.0927	-79.0566	306	Sto	BPV	Calcite	GG	N.A.	N.A.	N.A.	N.A.	118.0 to 118.3	2	P	3.78	118.3	102.232	127.79	3.932	4.915	0.152	1.135	0.6435	Evans et al. (2012)
RIG 272	39.0927	-79.0566	306	Sto	FV	Calcite	GG	N.A.	N.A.	N.A.	N.A.	93.8 to 96.4	3	P	3.78	96.4	79.456	99.32	3.056	3.82	-0.724	0.04	-0.342	Evans et al. (2012)
GRGAP 822	39.1261	-79.1814	300	Scl	NE	Quartz	MI	-124.5	4	P	5	N.A.	N.A.	N.A.	4.01	-124.5	N.D.	246	N.D.	9.5	N.D.	5.49	N.D.	Evans (2010)
GRGAP 823	39.1261	-79.1814	300	Scl	EW	Quartz	GG	N.A.	N.A.	N.A.	N.A.	149.0 to 158.9	6	PS	4.01	158.9	144.456	180.57	5.556	6.945	1.546	2.935	2.2405	Evans (2010)
ORKNY 222	38.8508	-78.7997	319	Scl	NW	Quartz	MI	-123.8	12	P	4	N.A.	N.A.	N.A.	4.9	-123.8	233	290	9	11.2	4.1	6.3	5.2	Evans (2010)
ORKNY 241	38.8661	-78.8211	317	Om	NE	Quartz	MI	-110.1	10	P	0	N.A.	N.A.	N.A.	5.9	-110.1	146	181	7.5	9.5	1.6	3.6	2.6	Evans (2010)
ORKNY 611	38.8269	-78.8369	318	Om	BPV	Quartz	MI	-117.9	12	P,U	2	N.A.	N.A.	N.A.	5.73	-117.9	192	240	7.4	9.2	1.67	3.47	2.57	Evans (2010)
Cross Section 16
CIRCL 141	38.7247	-79.4614	320	Dch	NE	Quartz	GG	105.5 (LHI)	5	PS	N.A.	N.A.	N.A.	N.A.	2.09	105.5	88.92	111.15	3.42	4.275	1.33	2.185	1.7575	Evans (2010)
CIRCL 621	38.7	-79.4722	321	Dch	NE	Quartz	GG	108.6 (LHI)	8	PS	N.A.	N.A.	N.A.	N.A.	2.12	108.6	92.144	115.18	3.544	4.43	1.424	2.31	1.867	Evans (2010)
COWKB 824	38.6586	-79.0733	347	Dch	EW	Quartz	GG	N.A.	N.A.	N.A.	N.A.	102.5 to 105.3	3	P	1.53	105.3	88.712	110.89	3.412	4.265	1.882	2.735	2.3085	Evans (2010)
COWKB 825	38.6586	-79.0733	347	Dch	FV	Quartz	GG	N.A.	N.A.	N.A.	N.A.	73.0 to 75.1	2	P	1.53	75.1	57.304	71.63	2.204	2.755	0.674	1.225	0.9495	Evans (2010)
COWKB 911	38.6639	-79.0083	348	Dch	ENE	Quartz	GG	N.A.	N.A.	N.A.	N.A.	168.3	2	P	2.51	168.3	154.232	192.79	5.932	7.415	3.422	4.905	4.1635	Evans (2010)
COWKB 913	38.6639	-79.0083	348	Dch	NW	Quartz	GG	N.A.	N.A.	N.A.	N.A.	173.9 to 182.3	5	P	2.51	182.3	168.792	210.99	6.492	8.115	3.982	5.605	4.7935	Evans (2010)
HOPEV 811	38.9094	-79.3244	322	Db and Dtr	FV	Quartz	MI	-90.2	9	P	0	N.A.	N.A.	N.A.	2.58	-90.2	55	59	2.1	2.3	-0.48	-0.28	-0.38	Evans (2010)
HOPEV 812	38.9094	-79.3244	322	Db and Dtr	FV	Quartz	GG	109 (LHI)	2	P	N.A.	N.A.	N.A.	N.A.	2.58	109	92.56	115.7	3.56	4.45	0.98	1.87	1.425	Evans (2010)
FTSBT 511	38.6739	-79.2033	346	Dm and Dmt	BPV	Quartz	II	-116	18	P	0	182.3 - 209.8	4	P	3.23	-116	210§§§	N.D.	8.1§§§	N.D.	4.9§§§	N.D.	N.D.	Evans (2010)
FTSBT 513	38.6739	-79.2033	346	Dm and Dmt	NE	Quartz	MI	-111.7	29	P	0	N.A.	N.A.	N.A.	3.23	-111.7	165	207	6.3	8	3.07	4.77	3.92	Evans (2010)
FTSBT 514	38.6739	-79.2033	346	Dm and Dmt	NW	Quartz	MI	-115.1	6	P	4	N.A.	N.A.	N.A.	3.23	-115.1	185	239	7.1	9.2	3.87	5.97	4.92	Evans (2010)
FTSBT 721	38.6592	-79.2414	345	Dm and Dmt	NE	Quartz	II	-115.7	18	P	3	181.5 - 199.5	5	P	3.53	-115.7	202§§§	N.D.	7.9§§§	N.D.	4.4§§§	N.D.	N.D.	Evans (2010)
ONEGO 812	38.7714	-79.4189	323	Dm and Dmt	FV	Quartz	MI	-96.3	4	P	2	N.A.	N.A.	N.A.	2.97	-96.3	79	101	3	3.9	0.03	0.93	0.48	Evans (2010)
FLKRN 512	38.6692	-78.9272	349	Dhl	NW	Calcite	GG	N.A.	N.A.	N.A.	N.A.	132.7	3	PS	4.49	132.7	117.208	146.51	4.508	5.635	0.018	1.145	0.5815	Evans (2010)
FRANK 211	38.7236	-79.3225	342	Dhl	BPV	Calcite	GG	N.A.	N.A.	N.A.	N.A.	150.8 to 158.1	2	P	3.39	158.1	143.624	179.53	5.524	6.905	2.134	3.515	2.8245	Evans (2010)
FTSBT 711	38.6617	-79.2425	344	Dhl	FV	Calcite	GG	N.A.	N.A.	N.A.	N.A.	98.9 to 105.1	3	P	3.73	105.1	88.504	110.63	3.404	4.255	-0.326	0.525	0.0995	Evans (2010)
FTSBT 713	38.6617	-79.2425	344	Dhl	NE	Calcite	GG	N.A.	N.A.	N.A.	N.A.	96.0 to 105.0	2	P	3.73	105	88.4	110.5	3.4	4.25	-0.33	0.52	0.095	Evans (2010)
FTSBT 714	38.6617	-79.2425	344	Dhl	EW	Calcite	GG	N.A.	N.A.	N.A.	N.A.	140.0 to 148.0	2	P	3.73	148	133.12	166.4	5.12	6.4	1.39	2.67	2.03	Evans (2010)
MOZAR 721	38.7747	-79.2208	343	Dhl	NE	Calcite	GG	N.A.	N.A.	N.A.	N.A.	134.8 to 135.6	2	P	3.51	135.6	120.224	150.28	4.624	5.78	1.114	2.27	1.692	Evans (2010)
FRANK 111	38.7306	-79.3517	340	Sto	NE	Quartz	MI	-110.1	3	P	0	N.A.	N.A.	N.A.	3.59	-110.1	148	178	5.7	6.8	2.11	3.21	2.66	Evans (2010)
FRANK 221	38.7264	-79.3325	341	Scl	NW	Quartz	MI	-102.8	7	P	0	N.A.	N.A.	N.A.	3.79	-102.8	108	126	4.2	4.8	3.7	1.01	2.355	Evans (2010)
TIMBR 911	38.6417	-78.8611	350	Oo	FV	Quartz	MI	-105.4	7	P	0	N.A.	N.A.	N.A.	5.9	-105.4	132	157	5.1	6	-0.8	0.1	-0.35	Evans (2010)
TIMBR 913	38.6417	-78.8611	350	Oo	NW	Calcite	MI	-118.5	6	P	1	N.A.	N.A.	N.A.	5.9	-118.5	195	244	7.5	9.4	1.6	3.5	2.55	Evans (2010)
CIRCL 212	38.7417	-79.4258	325	Om	BPV	Quartz	MI	-105.7	6	P	0	N.A.	N.A.	N.A.	4.61	-105.7	124	146	4.8	5.6	3.7	0.99	2.345	Evans (2010)
CIRCL 241	38.74	-79.4306	324	Om	BPV	Quartz	MI	-105.1	9	P	2	N.A.	N.A.	N.A.	4.41	-105.1	119	140	4.6	5.4	3.7	0.99	2.345	Evans (2010)
CIRCL 321	38.7078	-79.4139	326	Om	BPV	Quartz	MI	-105.7	7	P,U	2	N.A.	N.A.	N.A.	4.53	-105.7	124	146	4.8	5.6	3.7	1.07	2.385	Evans (2010)
CIRCL 512	38.7064	-79.4228	327	Om	BPV	Quartz	MI	-100	4	P	2	N.A.	N.A.	N.A.	4.62	-100	94	109	3.6	4.2	-1.02	-0.42	-0.72	Evans (2010)
CIRCL 541B	38.7025	-79.4375	328	Om	NE	Quartz	MI	-112.5	12	P	0	N.A.	N.A.	N.A.	4.63	-112.5	168	194	6.5	7.5	1.87	2.87	2.37	Evans (2010)
ONEGO 433	38.8028	-79.3764	329	Om	FV	Calcite	MI	-98.4	11	P,U	0	N.A.	N.A.	N.A.	5	-98.4	88	100	3.4	3.8	-1.6	-1.2	-1.4	Evans (2010)
TIMBR 361	38.7444	-78.7739	363	Om	NE	Calcite	MI	-105	3	PS	0	N.A.	N.A.	N.A.	5.94	-99.3	90	104	3.5	4	-2.44	-1.94	-2.19	Evans (2010)
CIRCL 232	38.7178	79.4253	330	Ot	BPV	Calcite	GG	N.A.	N.A.	N.A.	N.A.	134.8	2	P	5.21	134.8	119.392	149.24	4.592	5.74	-0.618	0.53	-0.044	Evans (2010)
CIRCL 233	38.7178	-79.4253	330	Ot	ENE	Calcite	MI	-101.6	3	PS	0	N.A.	N.A.	N.A.	5.21	-101.6	100	117	3.8	4.5	-1.41	-0.71	-1.06	Evans (2010)
CIRCL 234	38.7178	-79.4253	330	Ot	NW	Calcite	MI	-94.4	10	P	0	N.A.	N.A.	N.A.	5.21	-94.4	70	78	2.7	3	-2.51	-2.21	-2.36	Evans (2010)
CIRCL 711	38.6458	-79.4936	331	Ot	NE	Quartz	MI	-108.4	14	P,U	0	N.A.	N.A.	N.A.	5.2	-108.4	137	165	5.3	6.3	0.1	1.1	0.6	Evans (2010)
ONEGO 961	38.7744	-79.3778	333	Ot	BPV	Calcite	GG	N.A.	N.A.	N.A.	N.A.	158.5 to 160.5	5	PS	5.21	160.5	146.12	182.65	5.62	7.025	0.41	1.815	1.1125	Evans (2010)
ONEGO 423	38.7933	-79.3772	334	Obr	BPV	Calcite	GG	N.A.	N.A.	N.A.	N.A.	123.4 to 123.5	2	P	5.3	123.5	107.64	134.55	4.14	5.175	-1.16	-0.125	-0.6425	Evans (2010)
ONEGO 911	38.7736	-79.3883	335	Obr	NW	Calcite	GG	N.A.	N.A.	N.A.	N.A.	123.7	4	U	5.31	123.7	107.848	134.81	4.148	5.185	-1.162	-0.125	-0.6435	Evans (2010)
ONEGO 912	38.7736	-79.3883	335	Obr	NNW	Calcite	GG	N.A.	N.A.	N.A.	N.A.	121.5 to 129.0	2	P	5.31	129	113.36	141.7	4.36	5.45	-0.95	0.14	-0.405	Evans (2010)
ONEGO 914	38.7736	-79.3883	335	Obr	NE	Calcite	GG	N.A.	N.A.	N.A.	N.A.	101.9 to 109.1	2	P	5.31	109.1	92.664	115.83	3.564	4.455	-1.746	-0.855	-1.3005	Evans (2010)
ONEGO 921	38.7672	-79.3981	336	Obr	EW	Calcite	GG	N.A.	N.A.	N.A.	N.A.	104.2 to 115.8	4	P	5.31	115.8	99.632	124.54	3.832	4.79	-1.478	-0.52	-0.999	Evans (2010)
ONEGO 925	38.7672	-79.3981	336	Obr	BPV	Calcite	GG	N.A.	N.A.	N.A.	N.A.	120.0 to 128.6	7	P,U	5.31	128.6	112.944	141.18	4.344	5.43	-0.966	0.12	-0.423	Evans (2010)
ONEGO 931	38.7686	-79.3969	337	Obr	BPV	Calcite	GG	N.A.	N.A.	N.A.	N.A.	116.7 to 120.7	2	U	5.31	120.7	104.728	130.91	4.028	5.035	-1.282	-0.275	-0.7785	Evans (2010)
ONEGO 932	38.7686	-79.3969	337	Obr	NW	Calcite	GG	N.A.	N.A.	N.A.	N.A.	130.0 TO 138.1	2	PS	5.31	138.1	122.824	153.53	4.724	5.905	-0.586	0.595	0.0045	Evans (2010)
ONEGO 941	38.7706	-79.3958	338	Obr	BPV	Calcite	GG	N.A.	N.A.	N.A.	N.A.	128.3 to 135.1	3	PS	5.31	135.1	119.704	149.63	4.604	5.755	-0.706	0.445	-0.1305	Evans (2010)
ONEGO 97D1	38.7689	-79.3967	339	Obr	BPV	Calcite	GG	N.A.	N.A.	N.A.	N.A.	137.9	3	PS	5.31	137.9	122.616	153.27	4.716	5.895	-0.594	0.585	-0.0045	Evans (2010)
ONEGO 97I1	38.7689	-79.3967	339	Obr	EW	Calcite	GG	N.A.	N.A.	N.A.	N.A.	132.9	5	PS	5.31	132.9	117.416	146.77	4.516	5.645	-0.794	0.335	-0.2295	Evans (2010)
Cross Section 17
RDKNB 431	38.4519	-79.16	361	Mp	NW	Quartz	GG	N.A.	N.A.	N.A.	N.A.	77.4 to 90.4	5	P	0.8	90.4	73.216	91.52	2.816	3.52	2.016	2.72	2.368	Evans (2010)
PALTO 511	38.4481	-79.3167	360	Dch	NE	Quartz	MI	-136.5	11	P	0	N.A.	N.A.	N.A.	2.21	-127.7	276	276	10.6	10.6	8.39	8.39	8.39	Evans (2010)
PALTO 512	38.4481	-79.3167	360	Dch	BPV	Quartz	II	-118.7	27	P	0	192.2 - 192.5	2	P	2.21	-118.7	205§§§	N.D.	7.9§§§	N.D.	5.6§§§	N.D.	N.D.	Evans (2010)
SPKNB 921	38.6319	-79.5222	351	Dch	ENE	Quartz	GG	88.3 (LHI)	9	P	N.A.	N.A.	N.A.	N.A.	2.07	88.3	71.032	88.79	2.732	3.415	0.662	1.345	1.0035	Evans (2010)
SPKNB 922	38.6319	-79.5222	351	Dch	FV	Quartz	GG	77.8 (LHI)	8	P	N.A.	N.A.	N.A.	N.A.	2.07	77.8	60.112	75.14	2.312	2.89	0.242	0.82	0.531	Evans (2010)
SPKNB 951	38.65	-79.5083	352	Dch	NE	Quartz	GG	108.8 (LHI)	3	P	N.A.	N.A.	N.A.	N.A.	2.07	108.8	92.352	115.44	3.552	4.44	1.482	2.37	1.926	Evans (2010)
BRBCH 313	38.4953	-79.0175	362	Db and Dtr	NW	Quartz	GG	N.A.	N.A.	N.A.	N.A.	176.2 to 186.5	4	P	3.75	186.5	173.16	216.45	6.66	8.325	2.91	4.575	3.7425	Evans (2010)
SNYMT 211	38.5861	-79.5483	353	Db and Dtr	NE	Quartz	GG	N.A.	N.A.	N.A.	N.A.	100.1	4	P	3.09	100.1	83.304	104.13	3.204	4.005	0.114	0.915	0.5145	Evans (2010)
SGRGV 121	38.6097	-79.3511	357	Dor	FV	Calcite	GG	N.A.	N.A.	N.A.	N.A.	154.5 to 160.0	2	P	3.4	160	145.6	182	5.6	7	2.2	3.6	2.9	Evans (2010)
SGRGV 122	38.6097	-79.3511	357	Dor	NE	Quartz	GG	N.A.	N.A.	N.A.	N.A.	204	4	PS	3.4	204	191.36	239.2	7.36	9.2	3.96	5.8	4.88	Evans (2010)
DOEHL 913	38.4058	-79.405	359	Dhl	FV	Calcite	MI	-110.8	5	PS	0	N.A.	N.A.	N.A.	3.85	-110.8	150	184	5.8	7.1	1.95	3.25	2.6	Evans (2010)
MOATS 313	38.5917	-79.3975	356	Dhl	BPV	Quartz	MI	-121.5	10	P	0	N.A.	N.A.	N.A.	3.42	-121.5	218	218	8.4	8.4	4.98	4.98	4.98	Evans (2010)
MOATS 317	38.5917	-79.3975	356	Dhl	BPV	Quartz	GG	N.A.	N.A.	N.A.	N.A.	109.4 to 117.0	2	P	3.42	117	100.88	126.1	3.88	4.85	0.46	1.43	0.945	Evans (2010)
MOATS 911	38.5397	-79.3903	358	Dhl	NW	Calcite	GG	N.A.	N.A.	N.A.	N.A.	124.4	5	PS	3.63	124.4	108.576	135.72	4.176	5.22	0.546	1.59	1.068	Evans (2010)
SNYMT 311	38.5928	-79.5239	354	Om	BPV	Quartz	MI	-121.2	5	P	0	N.A.	N.A.	N.A.	4.4	-121.2	214	272	8.2	10.5	3.8	6.1	4.95	Evans (2010)
SNYMT 411	38.5631	-79.5092	355	Om	BPV	Quartz	MI	-115.5	16	P	4	N.A.	N.A.	N.A.	4.4	-115.5	178	218	6.8	8.4	2.4	4	3.2	Evans (2010)
Map only
HARMN 711	38.8783	-79.6228	N.A.	Dch	NW	Quartz	GG	129.8 (LHI)	4	P	N.A.	N.A.	N.A.	N.A.	0.4	129.8	114.192	142.74	4.392	5.49	3.992	5.09	4.541	Evans (2010)
ELKNS 611	38.8581	-79.8458	N.A.	Db and Dtr	NW	Quartz	GG	132.5 (LHI)	2	P	N.A.	N.A.	N.A.	N.A.	1.43	132.5	117	146.25	4.5	5.625	3.07	4.195	3.6325	Evans (2010)
BFALS 411 (core)	39.0629	-79.4055	N.A.	Dor	N.D.	Calcite	GG	N.A.	N.A.	N.A.	N.A.	175.1	6	PS	2.8	175.1	161.304	201.63	6.204	7.755	3.404	4.955	4.1795	Evans (2010)
GLADY 511 (116 core)	38.7908	-79.6876	N.A.	Dor	N.D.	Quartz	GG	N.A.	N.A.	N.A.	N.A.	176.8	5	P	2.64	176.8	163.072	203.84	6.272	7.84	3.632	5.2	4.416	Evans (2010)
LEADM 211 (core)	39.2361	-79.57	N.A.	St	N.D.	Quartz	GG	N.A.	N.A.	N.A.	N.A.	169.6	4	U	3.34	169.6	155.584	194.48	5.984	7.48	2.644	4.14	3.392	Evans (2010)
MILCK 611 (core)	38.7072	-79.9692	N.A.-	Ot	N.D.	Calcite	GG	N.A.	N.A.	N.A.	N.A.	178.4	8	PS	3.25	178.4	164.736	205.92	6.336	7.92	3.086	4.67	3.878	Evans (2010)
Notes: Data is presented only for the fluid inclusion assemblege in each sample that provides the highest trapping pressure.
*Formation Symbols: Db = Devonian Braillier Fm., Dch = Devonian Chemung Fm., Dck = Devonian Catskill Fm., Dhl = Devonian Helderberg Fm., Dm = Devonian Marcellus Fm., Dmt = Devonian Mhantango Fm., Dor - Devonian Orkskany Fm., Mmc = Mississippian Mauch Chunk Fm., Mp = Mississippian Pocono Fm.
Pl = Pennsylvanian Llewelleyn Fm., Pp = Pennsylvanian Pottsville Fm., Ob = Ordovicain Beekmantown Fm., Obr = Ordovician Black River Fm., Obe = Ordovician Bald Eagle Fm., Oj = Ordovician Juniata Fm., Om = Ordovician Martinsburg Fm., Oo Ordovician Oswego Fm., Ot = Ordovician Trenton Fm.
Sb = Silurian Bloomsburg Fm., Scl = Silurian Clinton Fm., St = Silurian Tuscarora Fm., Sto = Silurian Tonoloway Fm.
†method used to determine burial depth and/or trapping pressure (Evans 2010): GG = geothermal gradiant, MI = methane isochore, II = isochore intersection.
§ThH = homogenization temperature of hydrocarbon inclusions.
#N = Number of observations
**Fluid inclusion type: P = primary, PS = pseudosecondary, S = secondary, U = undifferentiated.
††ThA = homogenization of aqueous inclusions.
§§N.A. = Not Applicable.
##N.D. = Not Determined.
***LHI = Liquid Hydrocarbon Inclusions.
†††Vein set by strike orientation or origin: WNW = west-northwest strike, NW = northwest strike NNW = north-northwest strike, NS = north-south strike, NNE = north-northeast strike, NE = northeast strike, ENE = east-northeast strike, EW = east-west strike, FV = failt vein, CONC = concretion vein.
§§§ Value determined from isochore intersection.
